# Supplementary material for: Identification and characterization of a large family of superbinding bacterial SH2 domains
Source: PubMed Central journal article supplement (PMC6208348; doi:10.1038/s41467-018-06943-2), 2018-10-31
Supplement: 41467_2018_6943_MOESM1_ESM.pdf [file 41467_2018_6943_MOESM1_ESM.pdf]

**Supplementary Information to**  
**Identification and characterization of a large family of**  
**superbinding bacterial SH2 domains**

Tomonori Kaneko<sup>1</sup>, Peter J. Stogios<sup>2</sup>, Xiang Ruan<sup>1</sup>, Courtney Voss<sup>1</sup>, Elena Evdokimova<sup>2</sup>,  
Tatiana Skarina<sup>2</sup>, Amy Chung<sup>3</sup>, Xiaoling Liu<sup>1</sup>, Lei Li<sup>1,4</sup>, Alexei Savchenko<sup>2,5</sup>, Alexander W.  
Ensminger<sup>3</sup>, and Shawn S-C. Li<sup>1,6,\*</sup>

<sup>1</sup>Department of Biochemistry, Schulich School of Medicine and Dentistry, Western University, London, Ontario N6G 2V4, Canada; <sup>2</sup>Department of Chemical Engineering and Applied Chemistry, University of Toronto, Toronto, Ontario M5G 1L6; <sup>3</sup>Departments of Biochemistry and Molecular Genetics, MaRS Centre, West Tower, Floor 16, Toronto, Ontario M5G 1M1; <sup>4</sup>Cancer institute, the Affiliated Hospital of Qingdao University, Qingdao Cancer Institute and School of Basic Medicine, Qingdao University, 266021, Qingdao, China; <sup>5</sup>Department of Microbiology, Immunology and Infectious Disease, University of Calgary, 2500 University Dr. NW, Calgary, Alberta T2N 1N4; <sup>6</sup>Children's Health Research Institute, Lawson Health Research Institute, 800 Commissioner's Road East, London, Ontario N6C 2V5, Canada.

\*Corresponding author: sli@uwo.ca

Supplementary Information Contains 13 Supplementary Figures and 8 Supplementary Tables

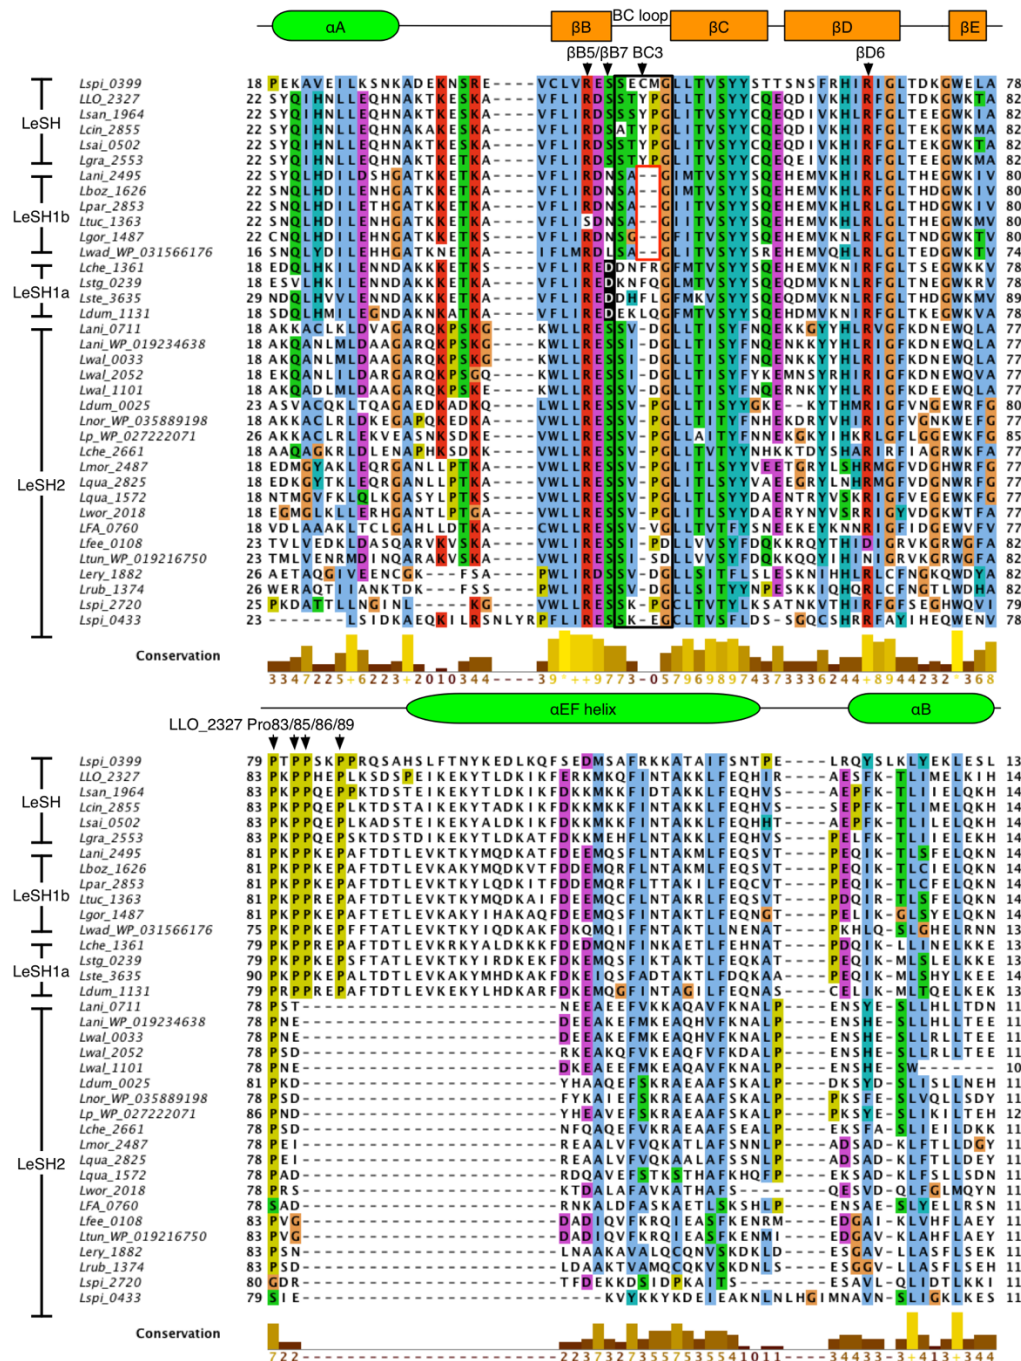

**Supplementary Figure 1 | Sequence alignment of LeSH, LeSH1a, LeSH1b and LeSH2.** The sequence alignment consists of six LeSH, four LeSH1a, six LeSH1b and 20 LeSH2 sequences (including paralogs LeSH2a, 2b, 2c). Arginine is strictly conserved at the  $\beta B5$  position, except for the LeSH1b-like *Ltuc\_1363* that has serine at  $\beta B5$ . Arginine also occupies the  $\beta D6$  position in all but two sequences. Four sequences have aspartic acid at the  $\beta B7$  position (highlighted in black), which are classified as LeSH1a. The BC loop of LeSH1b is two residues shorter (the sequence gap in the red box) than that of LeSH and LeSH1a. The secondary structure elements are based on the LeSH structure. The figure was prepared using Jalview (<http://www.jalview.org>) with the "Clustalx" amino acid color assignment.

|                   |                   | LeSH      |          |           |           |          |           |           |           |           |           | LeSH1b    |                   |           |          |          | LeSH1a    |           |                   |           |           | LeSH2     |           |                   |                 |           |           |           |           |           |          |           |                   |           |           |           |           |
|-------------------|-------------------|-----------|----------|-----------|-----------|----------|-----------|-----------|-----------|-----------|-----------|-----------|-------------------|-----------|----------|----------|-----------|-----------|-------------------|-----------|-----------|-----------|-----------|-------------------|-----------------|-----------|-----------|-----------|-----------|-----------|----------|-----------|-------------------|-----------|-----------|-----------|-----------|
|                   |                   | Lspi_0399 | LLO_2327 | Lsan_1964 | Lcin_2855 | Lai_0502 | Lgra_2553 | Lani_2495 | Lboz_1626 | Lpar_2853 | Ltuc_1363 | Lgor_1487 | Lwad_WP_031566176 | Lche_1361 | Lrg_0239 | Lte_3635 | Ldum_1131 | Lani_0711 | Lani_WP_019234638 | Lwal_0033 | Lwal_2052 | Lwal_1101 | Ldum_0025 | Lnor_WP_035889198 | Lp_WP_027222071 | Lche_2661 | Lmor_2487 | Lqua_2825 | Lqua_1572 | Lwor_2018 | LFA_0760 | Lfee_0108 | Ltum_WP_019216750 | Lery_1882 | Lrub_1374 | Lspi_2720 | Lspi_0433 |
| LeSH              | Lspi_0399         | 33        | 31       | 31        | 32        | 31       | 34        | 30        | 31        | 31        | 30        | 29        | 34                | 32        | 27       | 31       | 37        | 34        | 34                | 34        | 36        | 37        | 33        | 33                | 31              | 33        | 31        | 30        | 29        | 32        | 29       | 30        | 30                | 23        | 22        | 30        | 29        |
|                   | LLO_2327          | 33        | 83       | 83        | 87        | 79       | 55        | 55        | 55        | 52        | 51        | 46        | 51                | 53        | 50       | 54       | 32        | 34        | 34                | 34        | 33        | 35        | 35        | 32                | 32              | 32        | 32        | 28        | 34        | 28        | 29       | 28        | 24                | 24        | 31        | 26        |           |
|                   | Lsan_1964         | 31        | 83       | 90        | 91        | 87       | 61        | 62        | 62        | 59        | 55        | 50        | 53                | 58        | 54       | 56       | 29        | 32        | 32                | 29        | 33        | 32        | 31        | 29                | 33              | 31        | 31        | 27        | 34        | 26        | 29       | 28        | 22                | 23        | 32        | 26        |           |
|                   | Lcin_2855         | 31        | 83       | 90        | 91        | 86       | 59        | 59        | 59        | 57        | 54        | 49        | 52                | 55        | 52       | 56       | 27        | 30        | 29                | 30        | 31        | 31        | 28        | 32                | 29              | 29        | 26        | 32        | 25        | 29        | 29       | 21        | 22                | 32        | 24        |           |           |
|                   | Lai_0502          | 32        | 87       | 91        | 91        | 84       | 60        | 60        | 60        | 57        | 56        | 51        | 55                | 57        | 51       | 55       | 28        | 31        | 31                | 32        | 32        | 29        | 33        | 31                | 31              | 27        | 34        | 26        | 30        | 29        | 22       | 22        | 33                | 25        |           |           |           |
|                   | Lgra_2553         | 31        | 79       | 87        | 86        | 84       | 65        | 64        | 62        | 62        | 57        | 52        | 55                | 56        | 53       | 58       | 28        | 29        | 29                | 28        | 32        | 32        | 30        | 33                | 31              | 31        | 28        | 34        | 27        | 29        | 28       | 20        | 22                | 31        | 25        |           |           |
|                   | Lani_2495         | 34        | 55       | 61        | 59        | 60       | 65        | 90        | 88        | 89        | 76        | 67        | 67                | 69        | 66       | 65       | 29        | 30        | 30                | 28        | 30        | 28        | 29        | 26                | 28              | 27        | 27        | 26        | 29        | 27        | 28       | 26        | 18                | 17        | 23        | 24        |           |
|                   | Lboz_1626         | 30        | 55       | 62        | 59        | 60       | 64        | 90        | 92        | 87        | 78        | 68        | 67                | 69        | 68       | 64       | 28        | 29        | 29                | 26        | 29        | 28        | 27        | 26                | 27              | 27        | 27        | 27        | 27        | 27        | 26       | 24        | 19                | 18        | 23        | 24        |           |
|                   | Lpar_2853         | 31        | 55       | 62        | 59        | 60       | 62        | 88        | 92        | 87        | 76        | 70        | 64                | 67        | 64       | 63       | 28        | 29        | 29                | 26        | 29        | 28        | 27        | 27                | 27              | 28        | 28        | 32        | 27        | 26        | 24       | 20        | 18                | 22        | 23        |           |           |
|                   | Ltuc_1363         | 31        | 52       | 59        | 57        | 57       | 62        | 89        | 87        | 87        | 76        | 69        | 67                | 66        | 64       | 62       | 28        | 29        | 29                | 25        | 29        | 27        | 26        | 26                | 26              | 29        | 29        | 25        | 29        | 26        | 24       | 19        | 17                | 21        | 23        |           |           |
| Lgor_1487         | 30                | 51        | 55       | 54        | 56        | 57       | 76        | 78        | 76        | 76        | 68        | 70        | 71                | 68        | 66       | 28       | 29        | 29        | 25                | 28        | 28        | 25        | 25        | 26                | 29              | 30        | 27        | 29        | 28        | 25        | 24       | 18        | 17                | 22        | 24        |           |           |
| Lwad_WP_031566176 | 29                | 46        | 50       | 49        | 51        | 52       | 67        | 68        | 70        | 69        | 68        | 56        | 61                | 55        | 53       | 27       | 28        | 27        | 26                | 28        | 29        | 27        | 26        | 28                | 29              | 29        | 28        | 28        | 30        | 25        | 23       | 20        | 19                | 21        | 21        |           |           |
| LeSH1b            | Lani_2495         | 34        | 55       | 61        | 59        | 60       | 65        | 90        | 88        | 89        | 76        | 67        | 67                | 69        | 66       | 65       | 29        | 30        | 30                | 28        | 30        | 28        | 29        | 26                | 28              | 27        | 27        | 26        | 29        | 27        | 28       | 26        | 18                | 17        | 23        | 24        |           |
|                   | Lboz_1626         | 30        | 55       | 62        | 59        | 60       | 64        | 90        | 92        | 87        | 78        | 68        | 67                | 69        | 68       | 64       | 28        | 29        | 29                | 26        | 29        | 28        | 27        | 26                | 27              | 27        | 27        | 27        | 27        | 26        | 24       | 19        | 18                | 23        | 24        |           |           |
|                   | Lpar_2853         | 31        | 55       | 62        | 59        | 60       | 62        | 88        | 92        | 87        | 76        | 70        | 64                | 67        | 64       | 63       | 28        | 29        | 29                | 26        | 29        | 28        | 27        | 27                | 27              | 28        | 28        | 32        | 27        | 26        | 24       | 20        | 18                | 22        | 23        |           |           |
|                   | Ltuc_1363         | 31        | 52       | 59        | 57        | 57       | 62        | 89        | 87        | 87        | 76        | 69        | 67                | 66        | 64       | 62       | 28        | 29        | 29                | 25        | 29        | 27        | 26        | 26                | 26              | 29        | 29        | 25        | 29        | 26        | 24       | 19        | 17                | 21        | 23        |           |           |
|                   | Lgor_1487         | 30        | 51       | 55        | 54        | 56       | 57        | 76        | 78        | 76        | 76        | 68        | 70                | 71        | 68       | 66       | 28        | 29        | 29                | 25        | 28        | 28        | 25        | 25                | 26              | 29        | 30        | 27        | 29        | 28        | 25       | 24        | 18                | 17        | 22        | 24        |           |
| LeSH1a            | Lche_1361         | 34        | 51       | 53        | 52        | 55       | 55        | 67        | 67        | 64        | 67        | 70        | 56                | 75        | 69       | 70       | 25        | 27        | 27                | 26        | 26        | 27        | 26        | 26                | 26              | 29        | 31        | 32        | 27        | 28        | 29       | 28        | 17                | 20        | 25        | 27        |           |
|                   | Lstg_0239         | 32        | 53       | 58        | 55        | 57       | 56        | 69        | 67        | 66        | 71        | 61        | 75                | 77        | 69       | 27       | 29        | 29        | 28                | 30        | 31        | 28        | 27        | 28                | 28              | 29        | 25        | 29        | 28        | 25        | 25       | 20        | 18                | 23        | 25        |           |           |
|                   | Lte_3635          | 27        | 50       | 54        | 52        | 51       | 53        | 66        | 64        | 64        | 68        | 55        | 69                | 77        | 69       | 25       | 29        | 28        | 25                | 27        | 25        | 25        | 26        | 24                | 26              | 28        | 24        | 26        | 28        | 27        | 27       | 20        | 18                | 20        | 24        |           |           |
|                   | Ldum_1131         | 31        | 54       | 56        | 56        | 55       | 58        | 65        | 64        | 63        | 62        | 66        | 53                | 70        | 69       | 69       | 25        | 28        | 28                | 29        | 29        | 26        | 26        | 26                | 26              | 27        | 28        | 30        | 24        | 28        | 26       | 29        | 20                | 20        | 25        | 26        |           |
|                   | Lani_0711         | 37        | 32       | 29        | 27        | 28       | 28        | 29        | 28        | 28        | 28        | 27        | 25                | 27        | 25       | 25       | 81        | 80        | 69                | 80        | 53        | 59        | 55        | 48                | 42              | 42        | 43        | 37        | 44        | 36        | 34       | 33        | 34                | 30        | 26        |           |           |
| LeSH2             | Lani_WP_019234638 | 34        | 34       | 32        | 30        | 31       | 29        | 30        | 29        | 29        | 29        | 28        | 27                | 29        | 28       | 81       | 80        | 99        | 77                | 89        | 51        | 53        | 52        | 44                | 38              | 38        | 41        | 35        | 41        | 38        | 36       | 33        | 35                | 31        | 29        |           |           |
|                   | Lwal_0033         | 34        | 34       | 32        | 30        | 31       | 29        | 30        | 29        | 29        | 29        | 27        | 27                | 29        | 28       | 80       | 99        | 78        | 89                | 51        | 53        | 52        | 44        | 38                | 38              | 41        | 35        | 41        | 37        | 35        | 33       | 35        | 31                | 29        |           |           |           |
|                   | Lwal_2052         | 36        | 34       | 29        | 29        | 30       | 28        | 28        | 26        | 26        | 25        | 25        | 26                | 26        | 28       | 25       | 29        | 69        | 77                | 78        | 73        | 48        | 52        | 46                | 43              | 39        | 40        | 39        | 37        | 41        | 35       | 33        | 33                | 36        | 31        | 28        |           |
|                   | Lwal_1101         | 37        | 33       | 33        | 30        | 31       | 32        | 30        | 29        | 29        | 29        | 28        | 26                | 30        | 27       | 29       | 80        | 89        | 89                | 73        | 52        | 54        | 54        | 48                | 38              | 37        | 40        | 37        | 41        | 37        | 34       | 31        | 33                | 31        | 28        |           |           |
|                   | Ldum_0025         | 33        | 35       | 32        | 31        | 32       | 32        | 28        | 28        | 27        | 28        | 29        | 27                | 31        | 25       | 26       | 53        | 51        | 51                | 48        | 52        | 62        | 66        | 56                | 49              | 51        | 52        | 42        | 44        | 36        | 32       | 27        | 33                | 34        | 29        |           |           |
|                   | Lnor_WP_035889198 | 33        | 35       | 31        | 31        | 32       | 32        | 29        | 27        | 27        | 26        | 25        | 27                | 26        | 28       | 25       | 26        | 59        | 53                | 53        | 52        | 54        | 62        | 69                | 62              | 44        | 45        | 48        | 41        | 42        | 37       | 35        | 29                | 31        | 33        | 26        |           |
|                   | Lp_WP_027222071   | 31        | 32       | 29        | 28        | 29       | 30        | 26        | 26        | 27        | 26        | 25        | 26                | 26        | 27       | 26       | 55        | 52        | 52                | 46        | 54        | 66        | 69        | 59                | 40              | 42        | 45        | 34        | 39        | 32        | 32       | 29        | 33                | 34        | 26        |           |           |
|                   | Lche_2661         | 33        | 33       | 33        | 32        | 33       | 33        | 28        | 27        | 27        | 26        | 26        | 28                | 29        | 28       | 24       | 27        | 48        | 44                | 43        | 48        | 56        | 62        | 59                | 39              | 39        | 44        | 37        | 41        | 38        | 37       | 27        | 30                | 36        | 27        |           |           |
|                   | Lmor_2487         | 31        | 32       | 31        | 29        | 31       | 31        | 27        | 27        | 28        | 29        | 29        | 31                | 28        | 26       | 28       | 42        | 38        | 38                | 39        | 38        | 49        | 44        | 40                | 39              | 91        | 58        | 59        | 46        | 34        | 31       | 22        | 23                | 27        | 21        |           |           |
|                   | Lqua_2825         | 30        | 32       | 31        | 29        | 31       | 31        | 27        | 27        | 28        | 29        | 30        | 32                | 29        | 28       | 30       | 42        | 38        | 38                | 40        | 37        | 51        | 45        | 42                | 39              | 91        | 56        | 57        | 48        | 35        | 32       | 23        | 26                | 26        | 22        |           |           |
| Lqua_1572         | 29                | 28        | 27       | 26        | 27        | 28       | 26        | 27        | 28        | 25        | 27        | 28        | 27                | 25        | 24       | 43       | 41        | 41        | 39                | 40        | 52        | 48        | 45        | 44                | 58              | 56        | 56        | 46        | 34        | 31        | 23       | 30        | 28                | 20        |           |           |           |
| Lwor_2018         | 32                | 34        | 34       | 32        | 34        | 34       | 29        | 30        | 32        | 29        | 28        | 28        | 29                | 26        | 28       | 37       | 35        | 35        | 37                | 37        | 42        | 41        | 34        | 37                | 59              | 57        | 56        | 40        | 30        | 28        | 22       | 21        | 26                | 22        |           |           |           |
| LFA_0760          | 29                | 28        | 26       | 25        | 26        | 27       | 27        | 27        | 27        | 26        | 28        | 30        | 29                | 28        | 28       | 44       | 41        | 41        | 41                | 41        | 44        | 42        | 39        | 41                | 46              | 48        | 46        | 40        | 29        | 27        | 31       | 29        | 26                | 26        |           |           |           |
| Lfee_0108         | 30                | 29        | 29       | 30        | 29        | 28       | 26        | 26        | 26        | 25        | 25        | 28        | 25                | 27        | 29       | 36       | 38        | 37        | 35                | 37        | 36        | 37        | 32        | 38                | 34              | 35        | 34        | 30        | 29        | 85        | 23       | 24        | 27                | 26        |           |           |           |
| Ltum_WP_019216750 | 30                | 28        | 28       | 29        | 29        | 28       | 26        | 24        | 24        | 24        | 24        | 23        | 28                | 25        | 27       | 29       | 34        | 36        | 35                | 33        | 34        | 32        | 35        | 32                | 37              | 31        | 32        | 31        | 28        | 27        | 85       | 27        | 27                | 24        | 26        |           |           |
| Lery_1882         | 23                | 24        | 22       | 21        | 22        | 20       | 18        | 19        | 20        | 19        | 18        | 20        | 17                | 20        | 20       | 33       | 33        | 33        | 33                | 31        | 27        | 29        | 29        | 27                | 22              | 23        | 23        | 22        | 31        | 23        | 27       | 68        | 22                | 24        | 24        |           |           |
| Lrub_1374         | 22                | 24        | 23       | 22        | 22        | 22       | 17        | 18        | 18        | 17        | 17        | 19        | 20                | 18        | 18       | 20       | 34        | 35        | 35                | 36        | 33        | 33        | 33        | 33                | 30              | 23        | 26        | 30        | 21        | 29        | 24       | 27        | 68                | 25        | 24        |           |           |
| Lspi_2720         | 30                | 31        | 32       | 32        | 33        | 31       | 23        | 23        | 22        | 21        | 22        | 21        | 25                | 23        | 20       | 25       | 30        | 31        | 31                | 31        | 31        | 34        | 33        | 34                | 36              | 27        | 26        | 28        | 26        | 27        | 24       | 22        | 25                | 34        |           |           |           |
| Lspi_0433         | 29                | 26        | 26       | 24        | 25        | 25       | 24        | 24        | 23        | 23        | 24        | 21        | 27                | 25        | 24       | 26       | 26        | 29        | 29                | 28        | 28        | 29        | 26        | 26                | 27              | 21        | 22        | 20        | 22        | 26        | 26       | 24        | 24                | 34        |           |           |           |

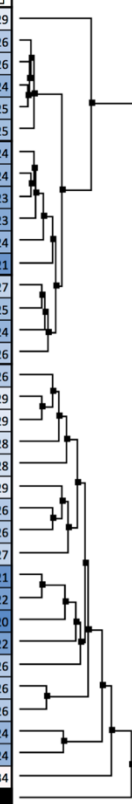

**Supplementary Figure 2 | Sequence identities between LeSH, LeSH1a, LeSH1b and LeSH2 SH2 domains.** Pairwise sequence identities between the domains are shown for all pairs, with a color gradient from low (blue) to high (red) identities. The phylogenetic tree on the right side shows relationship between the SH2 domains. The sequence identities and the average distance phylogenetic tree were derived from the sequence alignment in Supplementary Fig. 1. LeSH, LeSH1a, LeSH1b and LeSH2 belong to distinct phylogenetic branches.

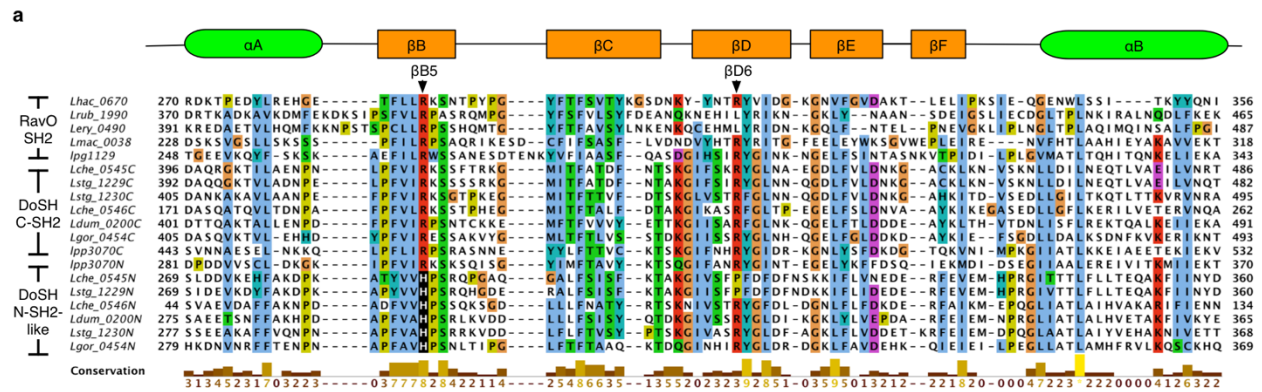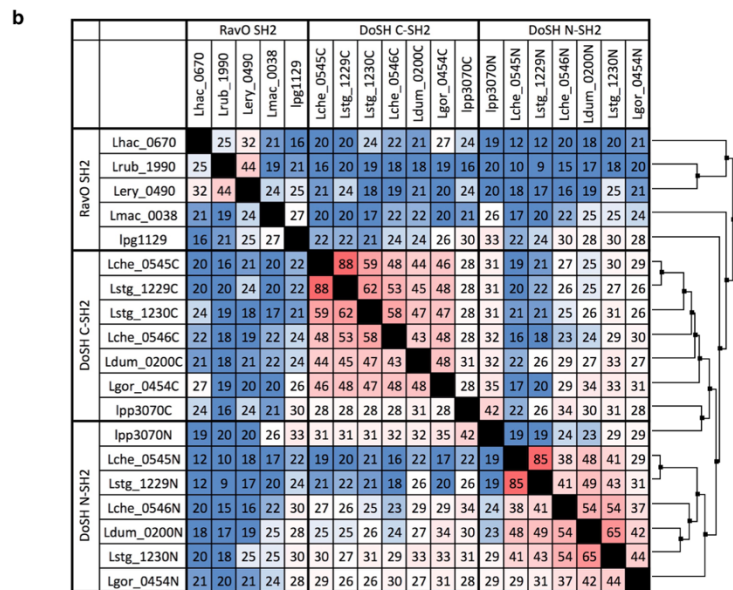

**c**

| <i>L. pneumophila</i> strain | RavO         | DoSH      |
|------------------------------|--------------|-----------|
| Paris                        | LPP1130      | LPP3070   |
| Philadelphia-1               | LP6_1129     | -         |
| Thunder Bay                  | LP6_1111     | -         |
| Lorraine                     | LPO_1140     | -         |
| LPE509                       | LPE509_02042 | -         |
| HL06041035                   | LPV_1278     | -         |
| ATCC43290                    | LP12_1107    | -         |
| Alcoy                        | (fragments)  | LPA_04394 |
| Corby                        | (fragments)  | LPC_3314  |
| Lens                         | -            | -         |

**Supplementary Figure 3 | Sequence analysis of RavO and DoSH SH2 domains. a.** Sequence alignment of five RavO SH2 domains and N- and C-terminal SH2 domains from seven DoSH (or DoSH1 and DoSH2) proteins. Note that a histidine, instead of an arginine, is located at  $\beta B5$  (colored black in the alignment), in the N-terminal SH2 domain of the DoSH proteins except for *L. pneumophila* DoSH (lpp3070). The secondary structure elements are based on the structure of the RavO SH2 domain. **b.** Pairwise sequence identities between the SH2 domains and an average distance phylogenetic tree based on the alignment. **c.** Distribution of the genes encoding RavO and DoSH in *L. pneumophila* strains. The complete genome sequences of ten *L. pneumophila* strains were used for the analysis. The sequence identity between the equivalent proteins is at least 90%. The "-" symbol indicates that no homologous protein was found in the strain.

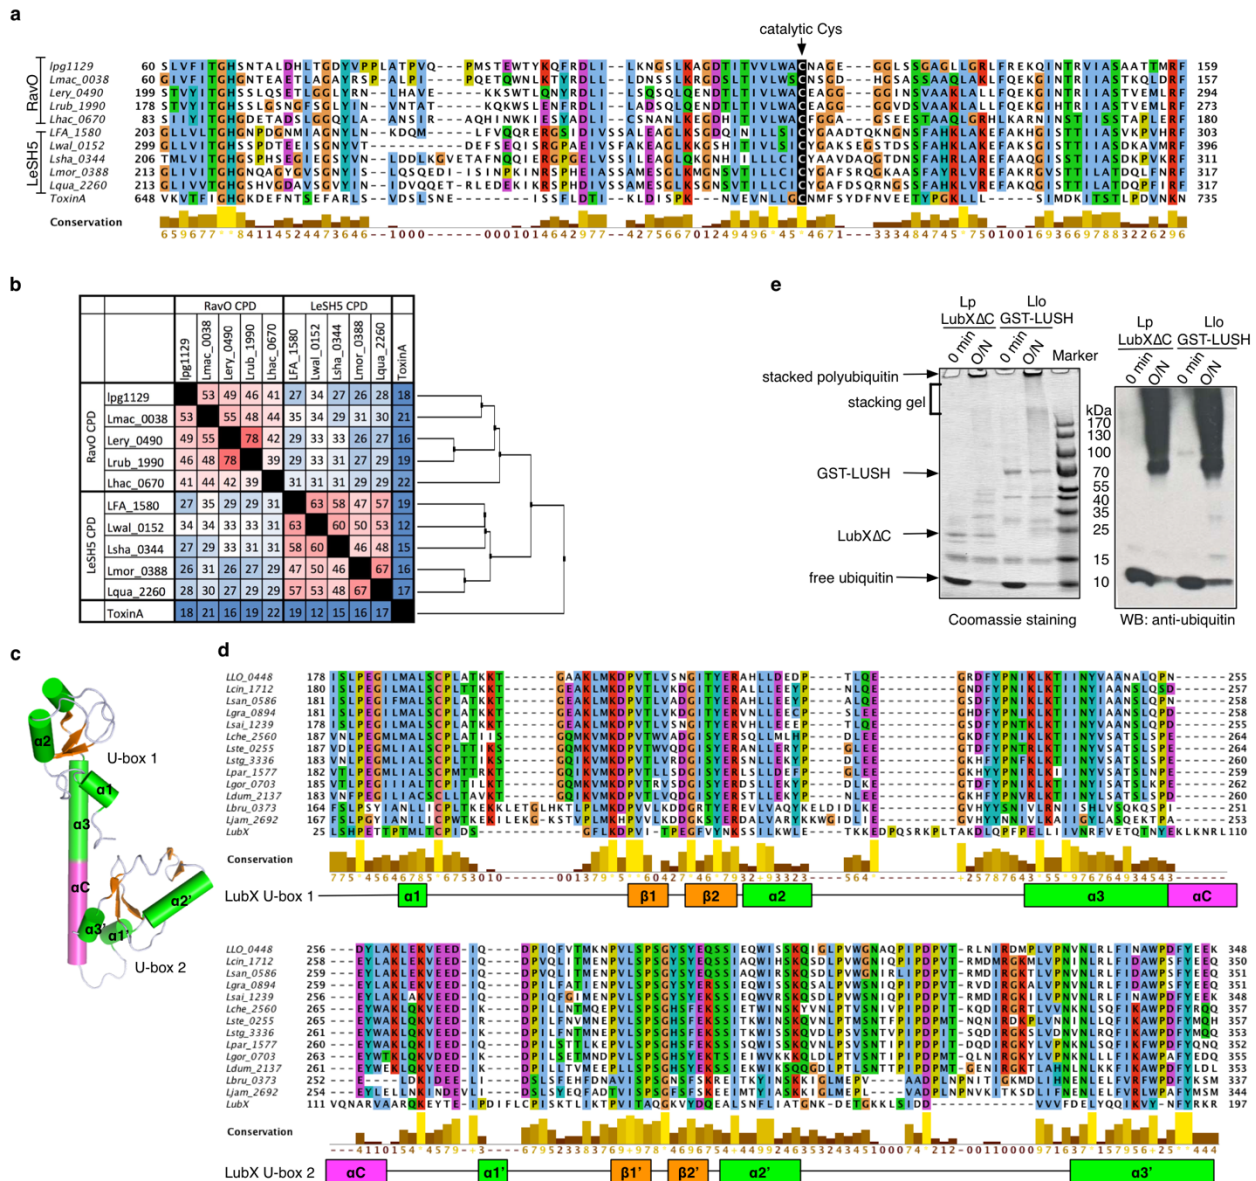

**Supplementary Figure 4 | Conserved domains identified in *Legionella* effector proteins that contain an SH2 domain. a.** Sequence alignment of six RavO cysteine protease domains (CPDs) and five LeSH5 CPDs. The cysteine protease Toxin A, a virulence factor secreted from *Clostridium difficile*, is included in the alignment as a reference. **b.** Pairwise sequence identities between the domains and an average distance phylogenetic tree based on the alignment in **a**. **c.** Structure of the *L. pneumophila* effector protein LubX, an E3 ubiquitin ligase with two U-box domains (PDB code 4WZ3). **d.** Sequence alignment of tandem U-box domains from 13 *Legionella* LUSH proteins. LubX is included as a reference for secondary structure elements. **e.** E3 ligase activity of *L. longbeachae* LUSH. Auto-ubiquitination assay was conducted using the full-length *L. longbeachae* LUSH fused with the GST tag (*Llo* GST-LUSH). Human UBE2D2 (also called UBC5B) was used as the ubiquitin-conjugating enzyme E2. *L. pneumophila* LubX (with a C-terminal truncation, *Lp* LubXΔC, residue 1-186) was used as the positive control of the E3 ubiquitin ligase activity. O/N: overnight reaction.

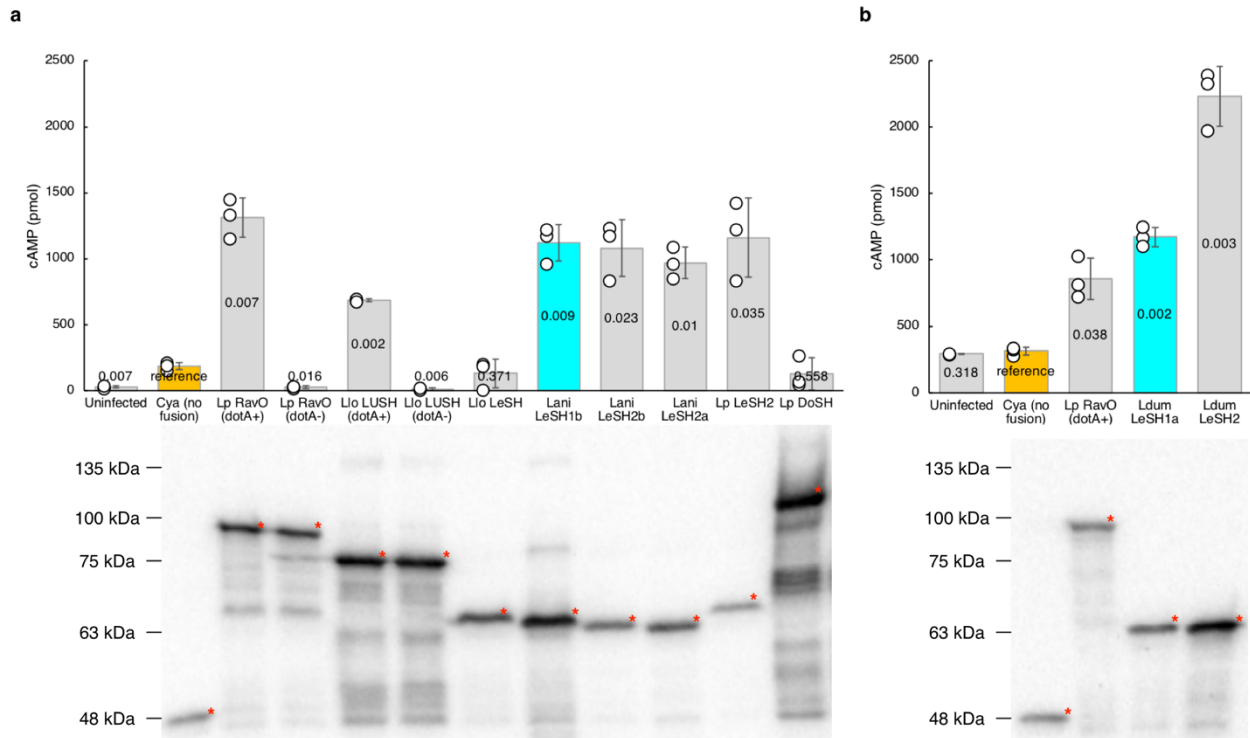

**Supplementary Figure 5 | The effector translocation assay. a and b.** *Legionella* SH2 proteins fused with the adenylate cyclase Cya were expressed in the *L. pneumophila* strain Lp02 (dotA+) or Lp03 (defect in the T4SS, or dotA-). Differentiated U937 cells were infected with bacteria expressing the different Cya-fusion protein. Translocation of the fusion proteins was monitored by the intracellular cyclic AMP (cAMP) level (upper panel), which is an indicator of the Cya activity in eukaryotic host cells. Protein expression level from each bacterial lysate was shown in the immunoblot (IB) using the antibody against Cya. The error bars indicate standard deviation from triplicate infection experiments. The two-tailed Student's paired t-test was employed to derive p-values that indicate statistically significant differences in translocation efficiency between each Cya-SH2 fusion protein and Cya alone ("no fusion", colored yellow), and the p-values were presented on each bar. Experiments in panels **a** and **b** were conducted on different days. The band of each Cya-fusion protein was indicated with a red asterisk (\*) on the western blots. *L. anisa* LeSH1b and *L. dumoffii* LeSH1a, colored cyan, are inactive SH2 domain proteins with no binding to pTyr peptides (see Fig. 3c).

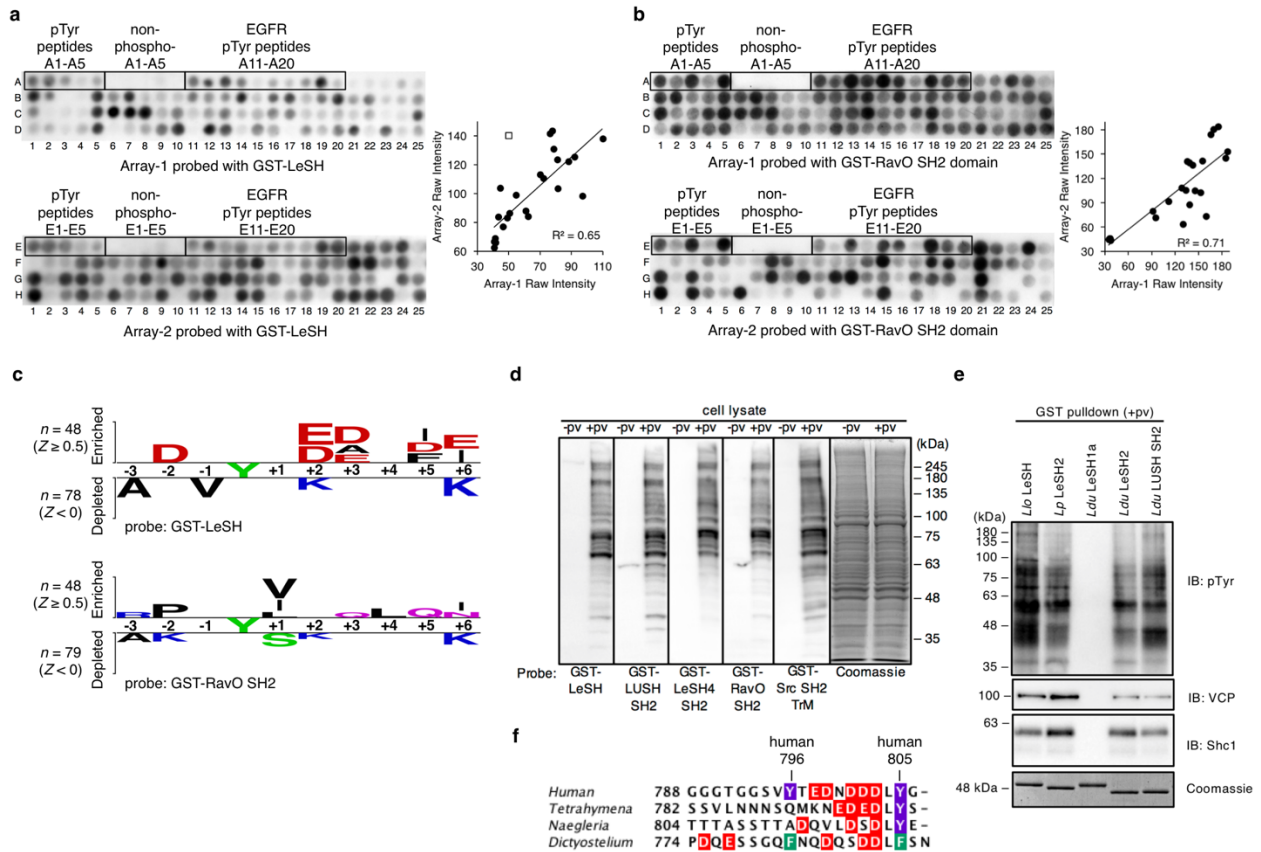

**Supplementary Figure 6 | Binding of *Legionella* SH2 domains to tyrosine-phosphorylated peptides and proteins. a-b.** Two copies of peptide array membranes (Array-1 and Array-2) incubated with either LeSH (panel a) or the RavO SH2 domain fused with GST (panel b). The first 20 peptides (A1 through A20) are identical in all four membranes. The bound protein was detected by the antibody against GST. See Supplementary Tables 3 and 4 for a list of peptide sequences and spot intensity readings. The correlation of spot intensities between Array-1 and Array-2 is also shown for LeSH (panel a), or for the RavO SH2 domain (panel b), derived from 24 pairs of identical peptides spotted in each membrane (spots A1 to A20 and four additional peptides). In panel a, one major outlier pair (open square), out of the 24 pairs, was excluded from the correlation calculation. The correlation was used for normalizing spot intensities between the two membranes to derive z-scores of peptide intensities (Supplementary Tables 5 and 6 for z-scores). **c.** Sequence preference of the *Legionella* SH2 domains. For each pair of membranes, either incubated with GST-LeSH (top panel) or the GST-RavO SH2 domain (bottom panel), peptides with high spot intensities (after normalization,  $z \geq 0.5$ ) were used as the positive set, whereas those with  $z < 0$  were used as the negative set, to generate the Two Sample Logo, based on the z-scores in Supplementary Tables 5 and 6. **d.** Far-Western blotting using *Legionella* SH2 domains to detect phosphoproteins. The same amount (20  $\mu$ g) of U937 cell lysate, either with (+pv) or without (-pv) pervanadate treatment, was transferred to the PVDF membrane, and SH2 domains fused with GST were incubated with the membrane strips. The SH2 domain bound to the membrane was detected by an antibody against GST. **e.** GST pull-down assay that contains four *Legionella* SH2 domains not included in Fig. 3e. **f.** The C-terminal tail sequences of VCP orthologs in protozoan hosts. The protein sequences are derived from *Naegleria gruberi*

(GenBank EFC40318), *Tetrahymena thermophila* (GenBank EAR87202) and *Dictyostelium discoideum* (GenBank EAL63377). Acidic residues (Asp and Glu) are colored red, Tyr in purple, and Phe in green. Tyr796 and Tyr805 are the known phosphorylation sites of human VCP.



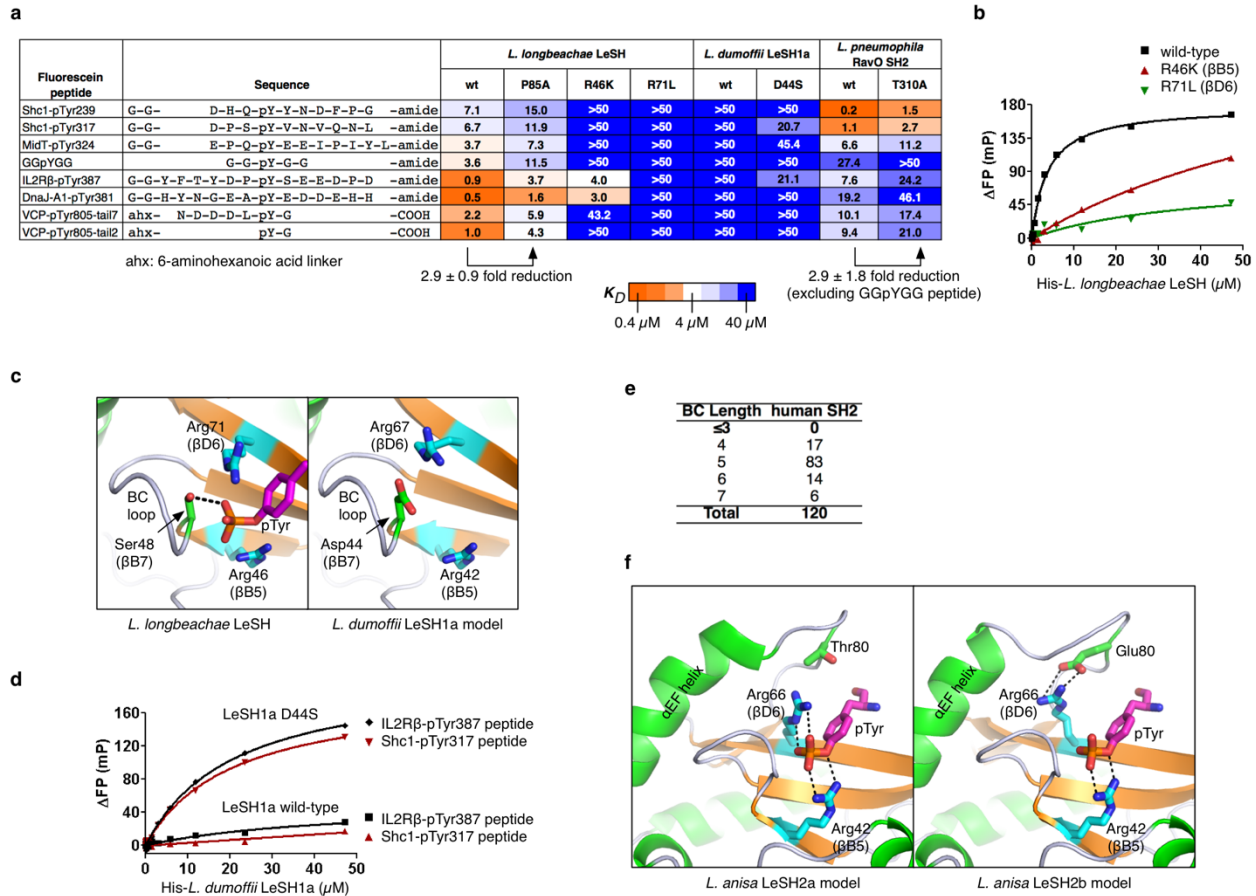

## Supplementary Figure 7 | The phosphotyrosine binding pocket of *Legionella* SH2 domains.

**a.** In-solution binding of phosphotyrosine-binding pocket mutants to tyrosine-phosphorylated peptides. Shown here are  $K_d$  values in  $\mu\text{M}$ , colored with a gradient from orange (high affinity) to blue (low affinity). The *Legionella* SH2 domains are N-terminally fused with a His<sub>6</sub> tag. **b.** In-solution binding of arginine mutants of His<sub>6</sub>-tagged LeSH to the GGpYGG peptide. **c.** A model of *L. dumoffii* LeSH1a based on the *L. longbeachae* LeSH structure, highlighting the pTyr-binding pocket. Note that the  $\beta\text{B7}$ -Ser48 (shown as green sticks) in *L. longbeachae* LeSH is replaced by Asp44 in *L. dumoffii* LeSH1a. A potential salt bridge formed between Asp44 and two arginines Arg42 and Arg67 in the latter may compete off pTyr binding. **d.** The gain-of-function mutant LeSH1a D44S. Binding curves of the wild-type and D44S mutant of LeSH1a to two tyrosine-phosphorylated peptides are shown. **e.** BC loop length distribution of 120 human SH2 domains. The majority of the human SH2 domains have a five-residue BC loop. No human SH2 domain has a three-residue BC loop. **f.** Model structures of *L. anisa* LeSH2a (Lani\_0711) and LeSH2b (Lani\_WP\_019234638) based on the LeSH structure. Both paralogs are encoded in the *L. anisa* Linanisette strain and they are 81% identical (Supplementary Fig. 2). Nevertheless, ligand binding activity of LeSH2b was substantially lower than that of LeSH2a (Fig. 3c). In the LeSH2b model, Glu80 is within the distance for an electric interaction with  $\beta\text{D6}$  arginine (Arg66), which might reduce pTyr-binding activity of LeSH2b, compared to LeSH2a that has Thr80 at the equivalent position.

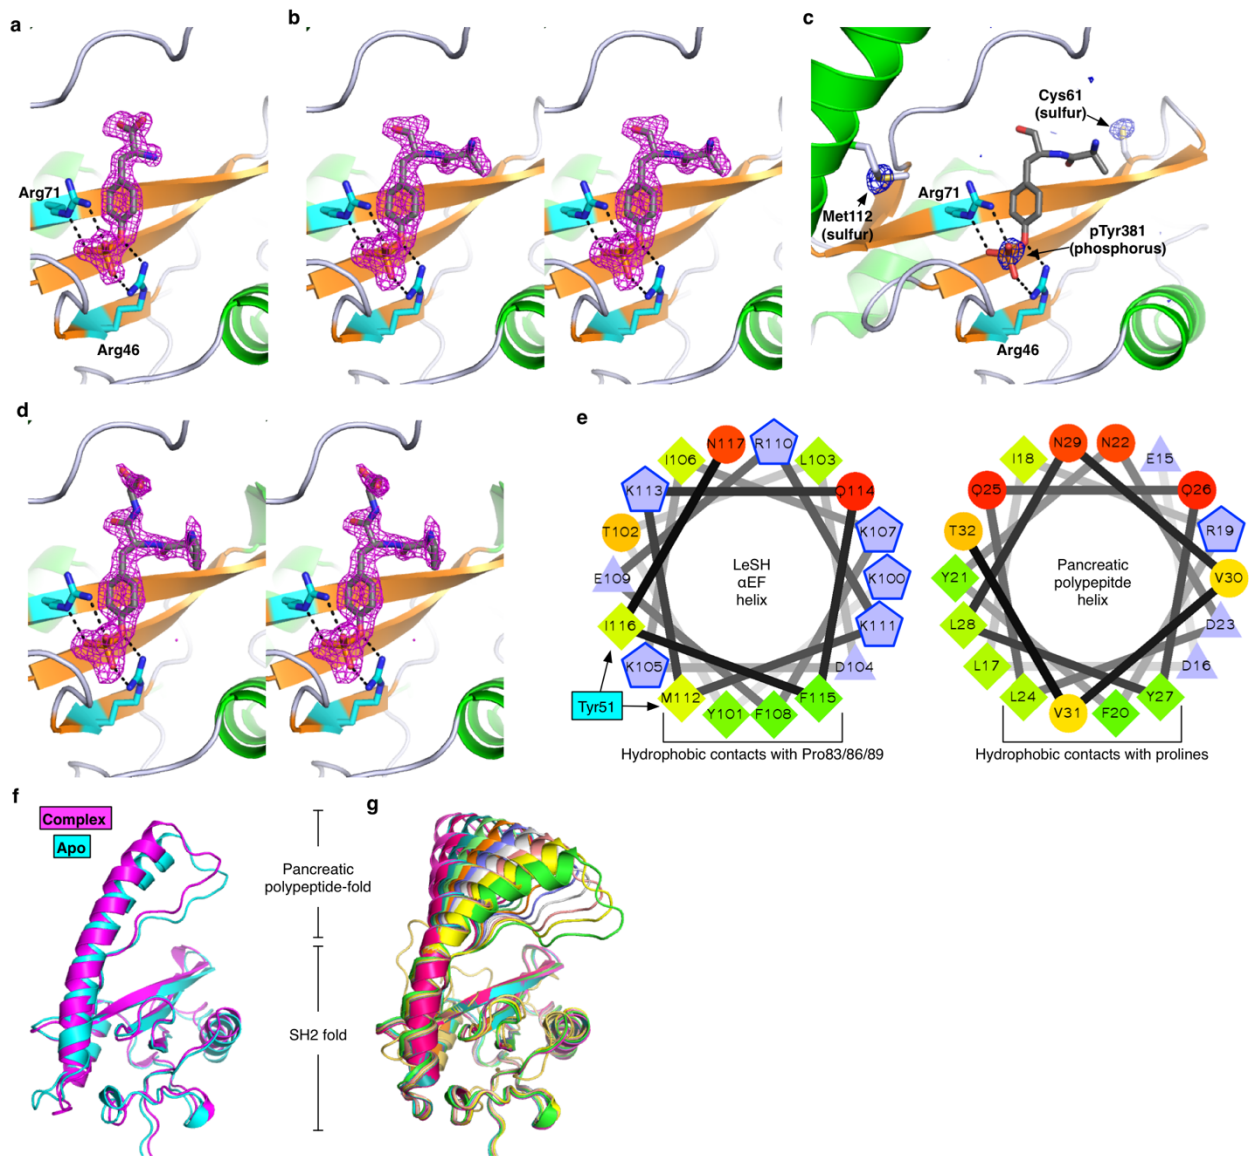

**Supplementary Figure 8 | Crystallography of *L. longbeachae* LeSH.** **a.** The *Fo-Fc* OMIT map of phosphotyrosine, contoured at  $3\sigma$ , in the complex structure of LeSH and the phosphotyrosine molecule. **b.** The electron density map of the DnaJ-A1 pTyr381 peptide HYNGEApY<sup>381</sup>EDDEHH-amide bound to LeSH. Only the underlined two residues (Ala-pTyr) of the peptide were fit in the electron density. Wall-eyed stereo image of the *Fo-Fc* OMIT map calculated for the ligand peptide is contoured at  $3\sigma$  and shown as a magenta mesh. The two arginine residues that provide salt bridges to the phosphate group of phosphotyrosine are shown as cyan sticks, with H-bonds as dotted lines. **c.** Anomalous signals at the phosphotyrosine-binding site. Anomalous density peaks contoured at  $4\sigma$  shown as a blue mesh correspond to sulfur atoms of LeSH (in Cys61 and Met112 side chains) and the phosphorus atom of phosphotyrosine. **d.** The *Fo-Fc* OMIT map of the IL2R $\beta$  pTyr387 peptide YFTYDPpY<sup>387</sup>SEEDPD-amide bound to LeSH, contoured at  $3\sigma$ . Only the underlined three residues (Pro-pTyr-Ser) of the peptide were fit in the electron density. **e.** (*left*) Helical wheel projection for the  $\alpha$ EF helix of LeSH. Positively charged residues (Arg and Lys) are shown as

blue pentagons. Pro83, Pro86 and Pro89 contact with the hydrophobic side of the helix. (*right*) Helical wheel projection of the avian pancreatic polypeptide (PDB code 2BF9). **f.** Comparison of the apo (cyan) and the ligand-bound (magenta) structures of LeSH. The IL2R $\beta$  pTyr387 peptide complex structure was used here. The root-mean-square deviation value for the backbone is 1.0 Å. **g.** Normal mode analysis of the LeSH structure. Coordinates derived from the lowest frequency mode are superimposed for the SH2 domain fold. The eINémo server was used for calculation.

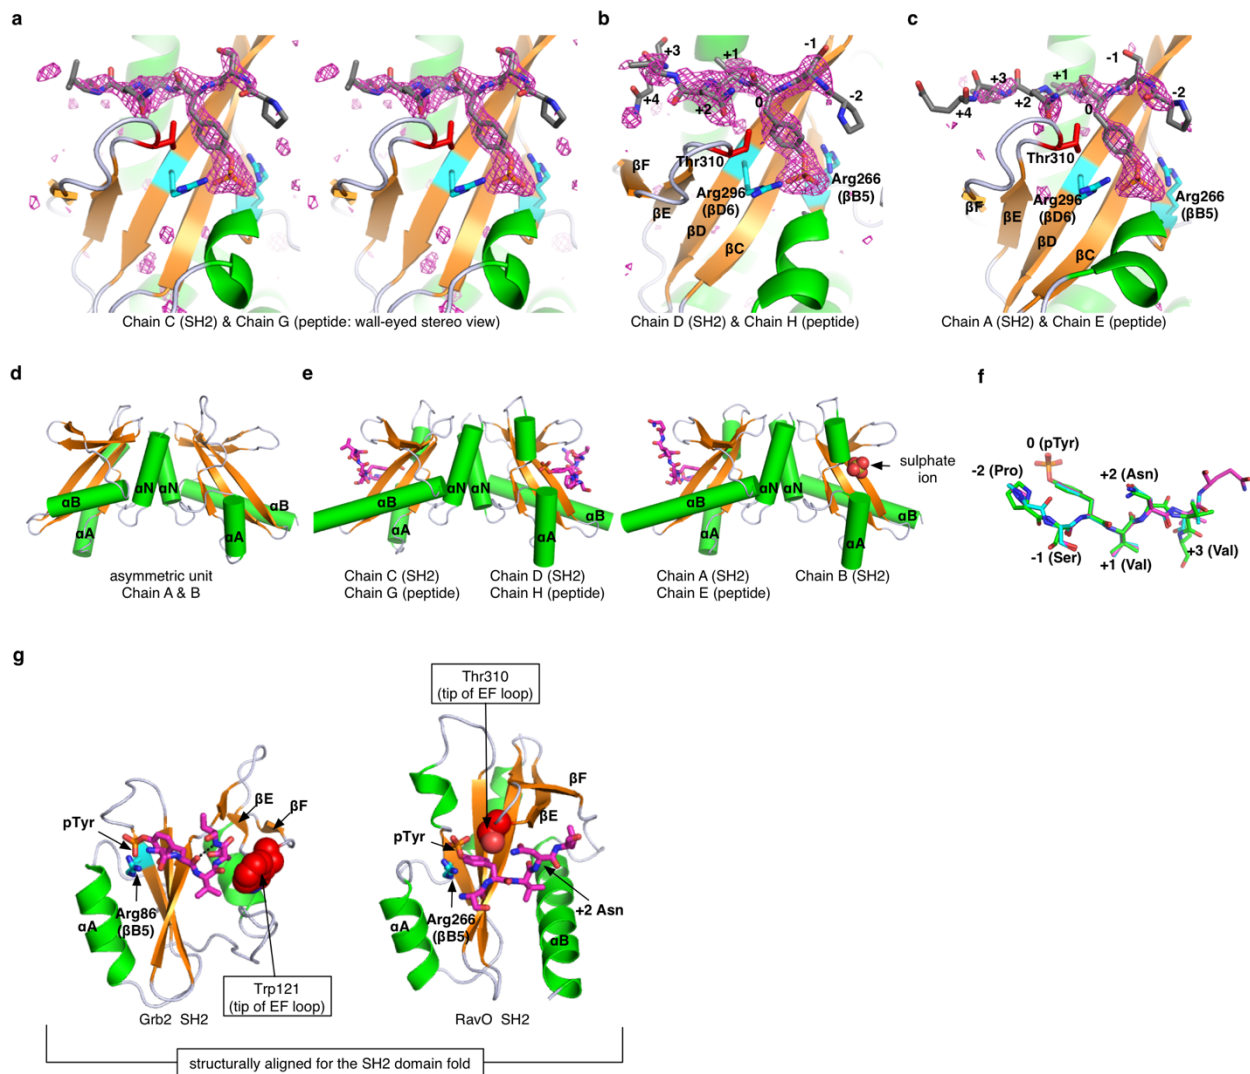

**Supplementary Figure 9 | Crystallography of the RavO SH2 domain.** **a-c.** The electron density maps of three Shc1 pTyr317 peptides identified in the asymmetric unit of the crystal of the SH2-peptide complex prepared by the peptide soaking method. The asymmetric unit consists of four SH2 molecules (chain A to D) and three peptide molecules (chain E, G and H). No bound peptide was observed for the SH2 molecule B, presumably due to crystal packing. The *F<sub>o</sub>-F<sub>c</sub>* OMIT map for the peptide contoured at 3  $\sigma$  is shown as a magenta mesh. The two arginine residues (Arg266 and Arg296) are shown as cyan sticks. Thr310 is shown as red sticks. **a.** A wall-eyed stereo view of the complex between Chain C (RavO SH2) and Chain G (peptide). **b.** The complex between Chain D (RavO SH2) and Chain H (peptide). **c.** The complex between Chain A (RavO SH2) and Chain E (peptide). **d.** Two SH2 domain molecules in the asymmetric unit of the apo RavO SH2 domain crystal. **e.** Four RavO SH2 domains in the asymmetric unit of the crystal soaked with the peptide. The SH2 domains are arranged as two pairs of dimers due to the crystal contact, which was also observed in the apo crystal in panel d. No peptide was bound to Chain B of the SH2 domain but electron density assigned as a sulfate ion was observed in the pTyr-binding pocket. **f.** Overlay of the three Shc1 pTyr317 peptides bound to the RavO SH2 domain in the asymmetric unit. Chain E is in magenta, Chain G in cyan and Chain H in green. **g.**

Ribbon representation of the human Grb2 SH2 domain (PDB code 1JYR, left) in comparison with the *L. pneumophila* RavO SH2 domain (right) bound to the same Shc1 pTyr317 peptide. This panel corresponds to the surface representation in Fig. 6, e and f. Thr310 of the RavO SH2 domain and Trp121 of the Grb2 SH2 domain, each of them located at the tip of the EF loop, are highlighted as red spheres.

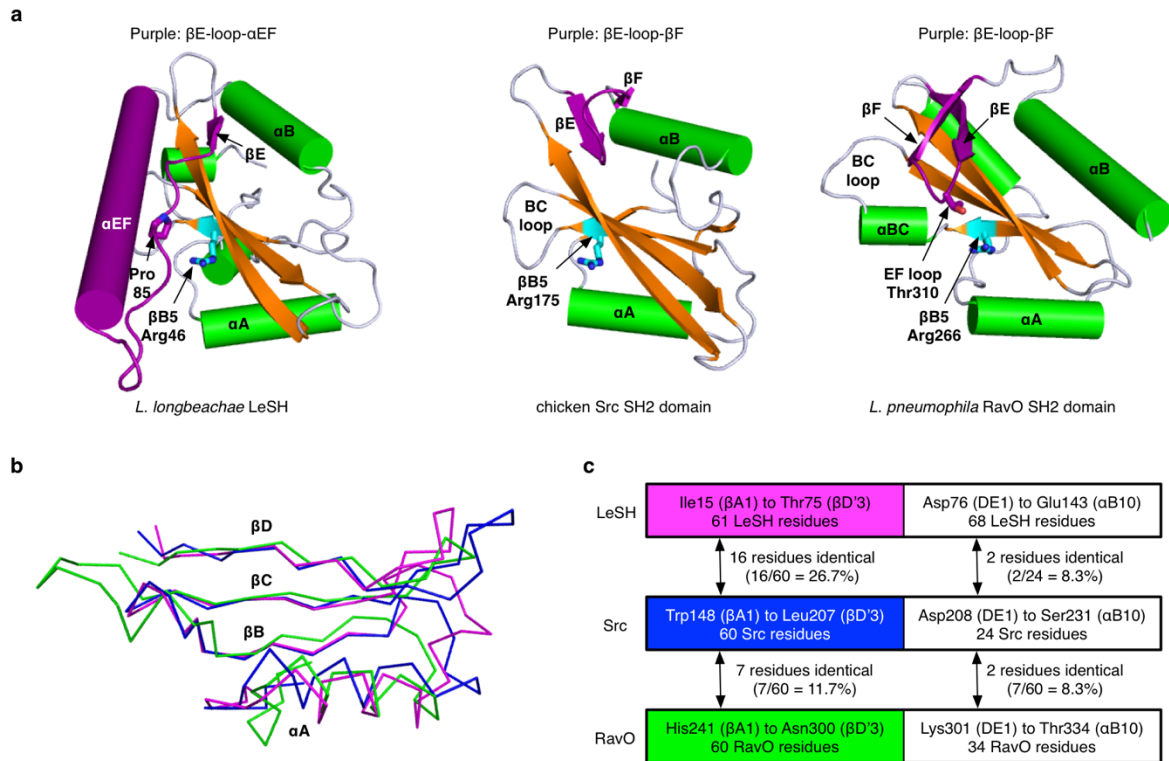

**Supplementary Figure 10 | Comparison of the SH2 domain fold.** **a.** Structures of *L. longbeachae* LeSH, the chicken Src SH2 domain and the *L. pneumophila* RavO SH2 domain are shown as ribbons. Helices and  $\beta$ -strands are colored green and orange, respectively. The region between  $\beta$ E and  $\beta$ F (or  $\alpha$ EF for LeSH) is colored purple. The  $\beta$ B5 arginine is shown as cyan sticks. **b.** Backbone trace for the N-terminal half of the three SH2 domains. The region from  $\alpha$ A to  $\beta$ D from each structure, involved in pTyr-binding pocket formation, is used for comparison. LeSH is in magenta, Src in blue and RavO in green. **c.** Sequence identities between the three structures, based on pairwise structure-based sequence alignment. Identical residues are counted for N-terminal ( $\alpha$ A to  $\beta$ D) and C-terminal portions of the structures.

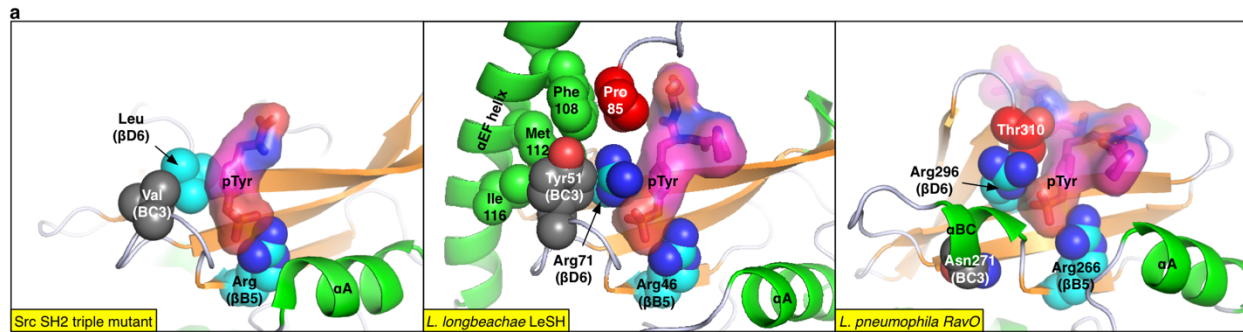

**b**

| SH2 domain  | Buried surface area for pTyr (Å <sup>2</sup> ) | PDB ID    |
|-------------|------------------------------------------------|-----------|
| <b>LeSH</b> | 249                                            | This work |
| PI3K p85α-C | 229                                            | 5AUL      |
| SOC6        | 223                                            | 2VIF      |
| SAP         | 214                                            | 1D4W      |
| Cbl         | 212                                            | 3BUX      |
| SHP2-C      | 208                                            | 5X7B      |
| Src         | 205                                            | 1SPS      |
| NCK2        | 205                                            | 2CIA      |
| Fyn         | 202                                            | 4U1P      |
| <b>RavO</b> | 201                                            | This work |
| Syk-N       | 196                                            | 1A81      |
| PI3K p85α-N | 191                                            | 2IUH      |
| VAV2        | 189                                            | 4ROJ      |
| BRDG1       | 185                                            | 3MAZ      |
| Grb2        | 181                                            | 1JYR      |
| SHP2-N      | 178                                            | 3TKZ      |
| Syk-C       | 177                                            | 1A81      |

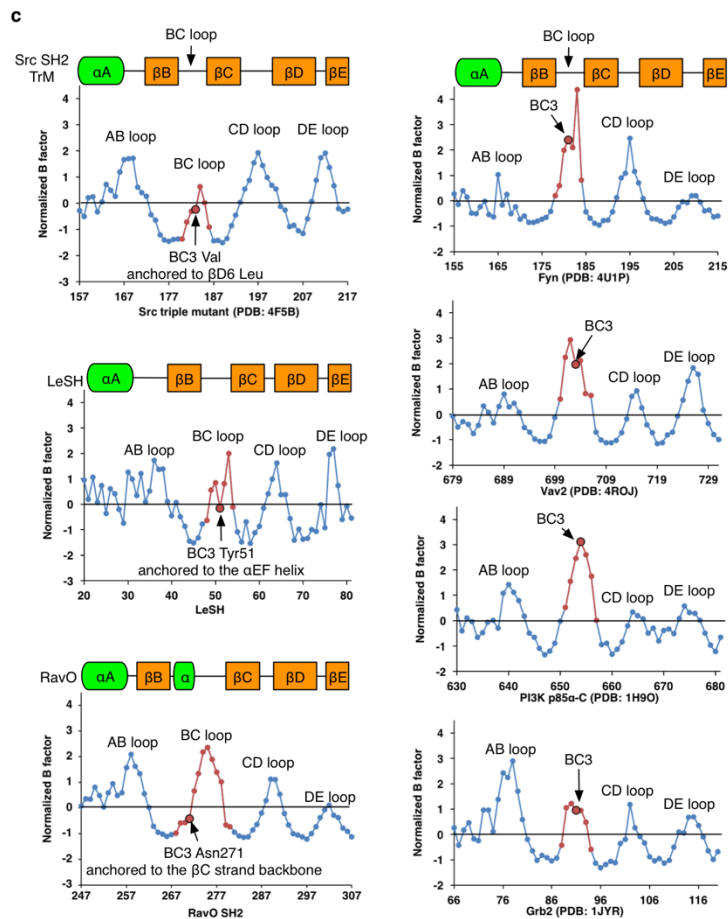

**Supplementary Figure 11 | Structural comparison between *Legionella* and mammalian SH2 domains.** **a.** A hydrophobic residue at the BC loop that stabilizes the loop in distinct ways. (*left* panel) The triple mutant of the Src SH2 domain (PDB code 4F5B). Valine at BC3 is paired with leucine at βD6 to form a hydrophobic contact and stabilizes the BC loop. The pair of hydrophobic residues synergistically increased binding affinity to phosphotyrosine. (*middle* panel) The phosphotyrosine binding pocket of LeSH. The BC3 residue Tyr51 is anchored to the hydrophobic patch provided by the amphipathic helix. Tyr51 also stabilizes the βD6 arginine residue Arg71 that contributes to forming the salt bridge with pTyr. Note that the conformation of pTyr is different from Src SH2, as shown in Fig. 5b, thus the role of the βD6 is distinct between the two structures. (*right* panel) The phosphotyrosine binding pocket of the RavO SH2 domain. The region equivalent to the BC loop in the Src or LeSH SH2 domain (from BC1 to

BC4) is replaced by an  $\alpha$  helix (which we named  $\alpha$ BC), so that the local structure is stabilized by the defined secondary structure element. **b.** Buried surface area calculated for the pTyr residue in the ligand peptides bound to SH2 domains. LeSH (the IL2R $\beta$  phosphopeptide complex), the RavO SH2 domain, and 15 human SH2 domain ligand complex structures were used here. **c.** Distribution of normalized B-factors of C $\alpha$  atoms in SH2 domain crystals in complex with ligand peptides. The B-factor of an atom reflects the degree of structural variation (displacement) of the atom in the crystal. Flexible regions, such as loops, tend to be associated with higher B-factors. The B factors are normalized for the region between  $\alpha$ A1 and  $\beta$ E4 as the Z-score. The four plots on the right panels were derived from wild type human SH2 domain structures complexed with ligand phosphopeptides. The three on the left are derived from the Src SH2 triple mutant (phosphotyrosine complex), LeSH (DnaJ-A1 peptide complex) and the RavO SH2 domain (Shc1 peptide complex).



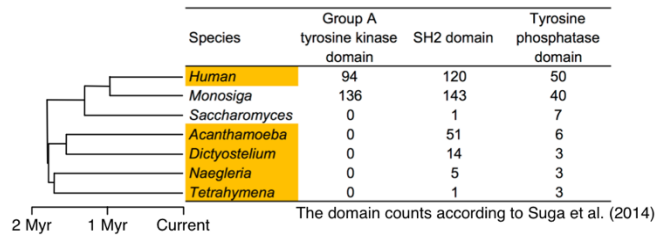

**Supplementary Figure 12 | Distribution of phosphotyrosine signaling domains among eukaryotic host species of *Legionella*.** The number of domains was taken from Suga et al. (*Mol Biol Evol* **31**, 517–528 (2014)). For example, human has 120 SH2 domains in 110 proteins. The time-calibrated phylogenetic tree was derived from Parfrey et al. (*Proc Natl Acad Sci USA* **108**, 13624–13629 (2011)). Myr: million year. Known host species of *Legionella* are highlighted in yellow. The species are *Monosiga brevicollis*, *Saccharomyces cerevisiae*, *Acanthamoeba castellanii*, *Dictyostelium discoideum*, *Naegleria gruberi*, *Tetrahymena thermophila*.

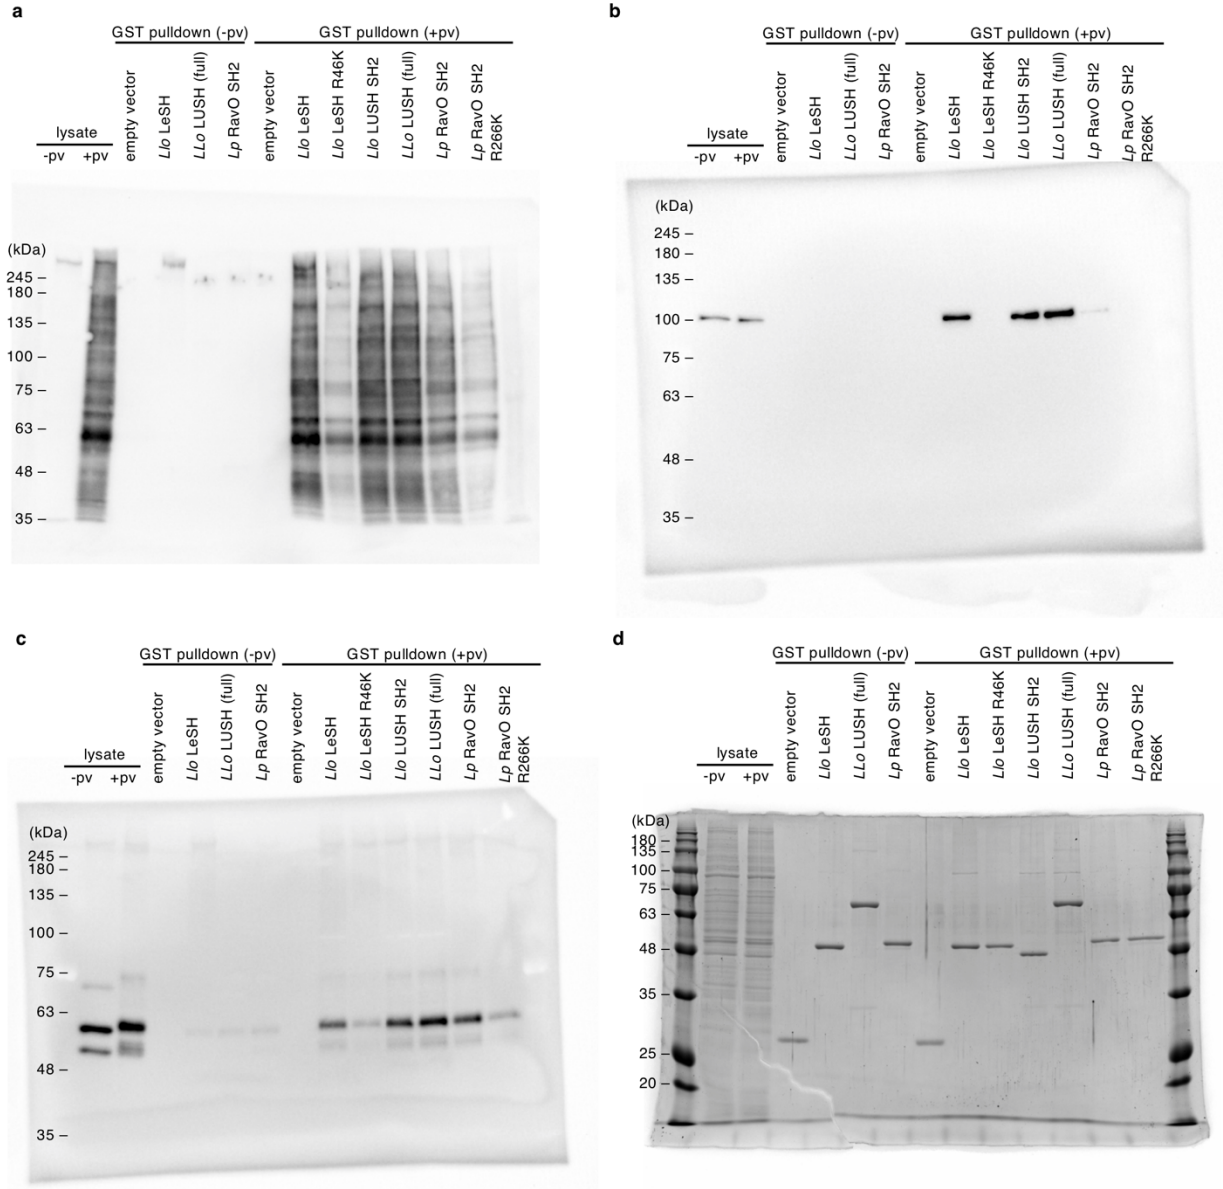

**Supplementary Figure 13 | Uncropped scans of Western blot and Coomassie staining gels used in Fig. 3e. a. pTyr Western blot. b. VCP Western blot. c. Shc1 Western blot. d. Coomassie staining gel.**

**Supplementary Table 1. A list of bacterial proteins that contain a sequence profile for the SH2 domain.**

| NCBI #       | Species                       | Strain         | Identifier        | Length | Name         | βB5 residue number(s) | Other domains identified by SMART and by Burstein et al. | LOG number (Burstein et al.) | Combined premissive learning score (taken from Burstein et al.) | Notes                                         |
|--------------|-------------------------------|----------------|-------------------|--------|--------------|-----------------------|----------------------------------------------------------|------------------------------|-----------------------------------------------------------------|-----------------------------------------------|
| KTC81785     | <i>L. cinцинnatiensis</i>     | CDC#72-OH-14   | Lcin_2855         | 168    | LeSH         | Arg46                 |                                                          | LOG_02684                    | 0.909                                                           |                                               |
| KTD06610     | <i>L. gratiana</i>            | ATCC49413      | Lgra_2553         | 167    | LeSH         | Arg46                 |                                                          | LOG_02684                    | 0.911                                                           |                                               |
| CBJ12739     | <i>L. longbeachae</i>         | NSW150         | LLO_2327          | 167    | LeSH         | Arg46                 |                                                          | LOG_02684                    | 0.966                                                           |                                               |
| KTD59858     | <i>L. sainthelensii</i>       | Mt.St.Helens-4 | Lsai_0502         | 167    | LeSH         | Arg46                 |                                                          | LOG_02684                    | 0.983                                                           |                                               |
| KTD60673     | <i>L. santircucis</i>         | SC-63-C7       | Lsan_1964         | 167    | LeSH         | Arg46                 |                                                          | LOG_02684                    | 0.996                                                           |                                               |
| KTD65687     | <i>L. spiritensis</i>         | Mt.St.Helens-9 | Lspi_0399         | 181    | LeSH         | Arg42                 |                                                          | LOG_02684                    | 0.987                                                           |                                               |
| KTC79341     | <i>L. cherrii</i>             | ORW            | Lche_1361         | 189    | LeSH1a       | Arg42                 |                                                          | LOG_02684                    | 0.896                                                           |                                               |
| KTC90063     | <i>L. dumoffii</i>            | NY-23          | Ldum_1131         | 182    | LeSH1a       | Arg42                 |                                                          | LOG_02684                    | 0.996                                                           |                                               |
| KTD67429     | <i>L. steelei</i>             | IMVS3376       | Lste_3635         | 188    | LeSH1a       | Arg53                 |                                                          | LOG_02684                    | 0.900                                                           |                                               |
| KTD81012     | <i>L. steigerwaltii</i>       | SC-18-C9       | Lstg_0239         | 189    | LeSH1a       | Arg42                 |                                                          | LOG_02684                    | 0.993                                                           |                                               |
| KTD41536     | <i>L. parisiensis</i>         | PF-209-C-C2    | Lpar_2853         | 184    | LeSH1b       | Arg46                 |                                                          | LOG_02684                    | 0.936                                                           |                                               |
| KTC69994     | <i>L. anisa</i>               | WA-316-C3      | Lani_2495         | 184    | LeSH1b       | Arg46                 |                                                          | LOG_02684                    | 0.923                                                           | NCBI# WP_019233116 in the Linanissette strain |
| KTC74186     | <i>L. bozemanii</i>           | WIGA           | Lboz_1626         | 184    | LeSH1b       | Arg46                 |                                                          | LOG_02684                    | 0.878                                                           |                                               |
| KTD03502     | <i>L. gormanii</i>            | LS-13          | Lgor_1487         | 180    | LeSH1b       | Arg46                 |                                                          | LOG_02684                    | 0.957                                                           |                                               |
| WP_031566176 | <i>L. wadsworthii</i>         | ATCC 33877     | Lwad_WP_031566176 | 177    | LeSH1b       | Arg40                 |                                                          | N/A                          | N/A                                                             |                                               |
| KTD73516     | <i>L. tucsonensis</i>         | ATCC49180      | Ltuc_1363         | 184    | LeSH1b-like  | Ser46                 |                                                          | LOG_02684                    | 0.860                                                           | Ser46 at BB5                                  |
| KTC74912     | <i>L. anisa</i>               | WA-316-C3      | Lani_0711         | 155    | LeSH2a       | Arg42                 |                                                          | LOG_02859                    | 0.998                                                           | NCBI# WP_019234449 in the Linanissette strain |
| WP_019234638 | <i>L. anisa</i>               | Linanissette   | Lani_WP_019234638 | 155    | LeSH2b       | Arg42                 |                                                          | N/A                          | N/A                                                             |                                               |
| KTC80641     | <i>L. cherrii</i>             | ORW            | Lche_2661         | 157    | LeSH2        | Arg42                 |                                                          | LOG_02859                    | 0.997                                                           |                                               |
| KTC93505     | <i>L. dumoffii</i>            | NY-23          | Ldum_0025         | 159    | LeSH2        | Arg47                 |                                                          | LOG_02859                    | 0.991                                                           |                                               |
| KTC96090     | <i>L. erythra</i>             | SE-32A-C8      | Lery_1882         | 156    | LeSH2        | Arg47                 |                                                          | LOG_02859                    | 0.991                                                           |                                               |
| WP_052673840 | <i>L. fallonii</i>            | LLAP-10        | LFA_0760          | 153    | LeSH2        | Arg42                 |                                                          | N/A                          | N/A                                                             |                                               |
| KTD04650     | <i>L. feeleii</i>             | WO-44C         | Lfee_0108         | 157    | LeSH2        | Arg47                 |                                                          | LOG_02859                    | 0.973                                                           |                                               |
| KTD31611     | <i>L. moravica</i>            | ATCC43877      | Lmor_2487         | 193    | LeSH2        | Arg42                 |                                                          | LOG_02859                    | 0.993                                                           |                                               |
| WP_035889198 | <i>L. norrlandica</i>         | LEGN           | Lnor_WP_035889198 | 156    | LeSH2        | Arg42                 |                                                          | N/A                          | N/A                                                             |                                               |
| WP_027222071 | <i>L. pneumophila</i>         | ATCC 33737     | Lp_WP_027222071   | 164    | LeSH2        | Arg50                 |                                                          | N/A                          | N/A                                                             |                                               |
| KTD51345     | <i>L. quateirensis</i>        | ATCC49507      | Lqua_1572         | 159    | LeSH2a/2b    | Arg42                 |                                                          | LOG_02859                    | 0.999                                                           |                                               |
| KTD44658     | <i>L. quateirensis</i>        | ATCC49507      | Lqua_2825         | 193    | LeSH2a/2b    | Arg42                 |                                                          | LOG_02859                    | 0.996                                                           |                                               |
| KTD49023     | <i>L. rubrilucens</i>         | WA-270A-C2     | Lrub_1374         | 152    | LeSH2        | Arg47                 |                                                          | LOG_02859                    | 0.990                                                           |                                               |
| KTD65721     | <i>L. spiritensis</i>         | Mt.St.Helens-9 | Lspi_0433         | 266    | LeSH2a/2b    | Arg44                 |                                                          | LOG_02859                    | 1.000                                                           |                                               |
| KTD61100     | <i>L. spiritensis</i>         | Mt.St.Helens-9 | Lspi_2720         | 195    | LeSH2a/2b    | Arg44                 |                                                          | LOG_02859                    | 1.000                                                           |                                               |
| WP_019216750 | <i>L. hantsiensis</i>         | LegM           | Ltm_WP_019216750  | 121    | LeSH2        | Arg47                 |                                                          | N/A                          | N/A                                                             |                                               |
| KTD83125     | <i>L. waltersii</i>           | ATCC51914      | Lwal_0033         | 155    | LeSH2a/2b/2c | Arg42                 |                                                          | LOG_02859                    | 1.000                                                           |                                               |
| KTD80404     | <i>L. waltersii</i>           | ATCC51914      | Lwal_1101         | 107    | LeSH2a/2b/2c | Arg42                 |                                                          | LOG_02684                    | 0.986                                                           |                                               |
| KTD76330     | <i>L. waltersii</i>           | ATCC51914      | Lwal_2052         | 155    | LeSH2a/2b/2c | Arg42                 |                                                          | LOG_02859                    | 1.000                                                           |                                               |
| KTD76793     | <i>L. waltersii</i>           | ATCC49508      | Lwor_2018         | 166    | LeSH2        | Arg42                 |                                                          | LOG_02859                    | 0.991                                                           |                                               |
| KTC89484     | <i>L. dumoffii</i>            | NY-23          | Ldum_0552         | 320    | LeSH3        | Arg55                 |                                                          | LOG_07829                    | 0.040                                                           |                                               |
| KTD00235     | <i>L. gormanii</i>            | LS-13          | Lgor_3130         | 332    | LeSH3        | Arg55                 |                                                          | LOG_07829                    | 0.056                                                           |                                               |
| WP_031567682 | <i>L. wadsworthii</i>         | ATCC 33877     | Lwad_WP_031567682 | 298    | LeSH3        | Arg36                 |                                                          | N/A                          | N/A                                                             |                                               |
| KTC73067     | <i>L. birminghamensis</i>     | CDC#1407-AL-14 | Lbir_1119         | 352    | LeSH4        | Arg62                 | Ubox (254-300)                                           | LOG_04518                    | 1.000                                                           |                                               |
| KTC93200     | <i>L. cinцинnatiensis</i>     | CDC#72-OH-14   | Lcin_0238         | 453    | LeSH4        | Arg109                |                                                          | LOG_04518                    | 1.000                                                           |                                               |
| EHL28955     | <i>L. drancourtii</i>         | LLAP12         | LDG_8949          | 391    | LeSH4        | Arg66                 |                                                          | LOG_04518                    | 0.998                                                           |                                               |
| KTD14725     | <i>L. israelensis</i>         | Bercovier 4    | Lisr_2433         | 296    | LeSH4        | Arg50                 |                                                          | LOG_04518                    | 0.998                                                           |                                               |
| KTD20948     | <i>L. lansingensis</i>        | ATCC49751      | Llan_1678         | 423    | LeSH4        | Arg94                 |                                                          | LOG_04518                    | 1.000                                                           |                                               |
| WP_043873924 | <i>L. massiliensis</i>        | LegA           | Lmas_WP_043873924 | 351    | LeSH4        | Arg58                 |                                                          | N/A                          | N/A                                                             |                                               |
| WP_058535099 | <i>L. saudiensis</i>          | LH-SWC         | Lsao_WP_058535099 | 392    | LeSH4        | Arg53                 |                                                          | N/A                          | N/A                                                             |                                               |
| KTD50084     | <i>L. quinlivanii</i>         | CDC#1442-AUS-E | Lqui_1409         | 373    | LeSH4        | Arg60                 | Ubox (263-307)                                           | LOG_04518                    | 1.000                                                           |                                               |
| WP_045095561 | <i>L. fallonii</i>            | LLAP-10        | LFA_1580          | 601    | LeSH5        | Arg49                 |                                                          | N/A                          | N/A                                                             |                                               |
| KTD37525     | <i>L. moravica</i>            | ATCC43877      | Lmor_0388         | 587    | LeSH5        | Arg50                 | CPD (209-317), L06 (510-582)                             | LOG_04812                    | 1.000                                                           |                                               |
| KTD47866     | <i>L. quateirensis</i>        | ATCC49507      | Lqua_2260         | 436    | LeSH5        | Arg50                 | CPD (209-317)                                            | LOG_04812                    | 0.999                                                           |                                               |
| KTD64975     | <i>L. shakespearei</i>        | ATCC49655      | Lsha_0344         | 547    | LeSH5        | Arg49                 | CPD (202-311), L06 (459-538)                             | LOG_04812                    | 1.000                                                           |                                               |
| KTD83036     | <i>L. waltersii</i>           | ATCC51914      | Lwal_0152         | 533    | LeSH5        | Arg51, Arg155         | CPD (295-396)                                            | LOG_04812                    | 1.000                                                           |                                               |
| KTC86432     | <i>L. brunensis</i>           | ATCC43878      | Lbru_0373         | 344    | LUSH         | Arg55                 | Ubox (174-242), Ubox (259-323)                           | LOG_02977                    | 0.294                                                           |                                               |
| KTC80540     | <i>L. cherrii</i>             | ORW            | Lche_2560         | 375    | LUSH         | Arg60                 | Ubox (276-350)                                           | LOG_02977                    | 0.304                                                           |                                               |
| KTC86252     | <i>L. cinцинnatiensis</i>     | CDC#72-OH-14   | Lcin_1712         | 361    | LUSH         | Arg56                 | Ubox (192-246), Ubox (272-343)                           | LOG_02977                    | 0.409                                                           |                                               |
| KTC91069     | <i>L. dumoffii</i>            | NY-23          | Ldum_2137         | 368    | LUSH         | Arg56                 | Ubox (272-346)                                           | LOG_02977                    | 0.608                                                           |                                               |
| KTD05072     | <i>L. gormanii</i>            | LS-13          | Lgor_0703         | 369    | LUSH         | Arg58                 | Ubox (274-348)                                           | LOG_02977                    | 0.465                                                           |                                               |
| KTD13602     | <i>L. gratiana</i>            | ATCC49413      | Lgra_0894         | 362    | LUSH         | Arg56                 | Ubox (193-247), Ubox (273-344)                           | LOG_02977                    | 0.423                                                           |                                               |
| KTD08497     | <i>L. jamestowniensis</i>     | JA-26-G1-E2    | Ljam_2692         | 353    | LUSH         | Arg54                 | Ubox (267-330)                                           | LOG_02977                    | 0.351                                                           |                                               |
| CBJ10779     | <i>L. longbeachae</i>         | NSW150         | LLO_0448          | 359    | LUSH         | Arg56                 | Ubox (190-244), Ubox (270-341)                           | LOG_02977                    | 0.705                                                           |                                               |
| KTD40260     | <i>L. parisiensis</i>         | PF-209-C-C2    | Lpar_1577         | 367    | LUSH         | Arg59                 | Ubox (274-345)                                           | LOG_02977                    | 0.455                                                           |                                               |
| KTD58632     | <i>L. sainthelensii</i>       | Mt.St.Helens-4 | Lsai_1239         | 359    | LUSH         | Arg56                 | Ubox (190-244), Ubox (270-341)                           | LOG_02977                    | 0.796                                                           |                                               |
| KTD66641     | <i>L. santircucis</i>         | SC-63-C7       | Lsan_0586         | 362    | LUSH         | Arg56                 | Ubox (193-247), Ubox (273-344)                           | LOG_02977                    | 0.431                                                           |                                               |
| KTD71489     | <i>L. steelei</i>             | IMVS3376       | Lste_0255         | 375    | LUSH         | Arg60                 | Ubox (276-350)                                           | LOG_02977                    | 0.446                                                           |                                               |
| KTD69895     | <i>L. steigerwaltii</i>       | SC-18-C9       | Lstg_3336         | 371    | LUSH         | Arg56                 | Ubox (272-346)                                           | LOG_02977                    | 0.299                                                           |                                               |
| KRG18663     | <i>Coxiellaceae bacterium</i> | HT99           | Coxi_KRG18663     | 343    | LUSH         | Arg49                 | Ubox (260-316)                                           | N/A                          | N/A                                                             |                                               |
| KTC99589     | <i>L. erythra</i>             | SE-32A-C8      | Lery_0490         | 655    | RavO         | Arg415                | CPD (195-294), L35 (568-625)                             | LOG_05208                    | 0.999                                                           |                                               |
| KTD13826     | <i>L. hackeliae</i>           | 798-PA-H       | Lhac_0670         | 371    | RavO         | Arg288                | CPD (79-180)                                             | LOG_05208                    | 0.999                                                           |                                               |
| KTD31994     | <i>L. maceachernii</i>        | PX-1-G2-E2     | Lmac_0038         | 354    | RavO         | Arg246                | CPD (56-157)                                             | LOG_05208                    | 1.000                                                           |                                               |
| AAU27215     | <i>L. pneumophila</i>         | Philadelphia-1 | lpg1129           | 519    | RavO         | Arg266                | CPD (56-159)                                             | LOG_05208                    | 1.000                                                           | lpp1130 in the Paris strain                   |
| KTD47068     | <i>L. rubrilucens</i>         | WA-270A-C2     | Lrub_1990         | 634    | RavO         | Arg394                | CPD (174-273), L35 (542-598)                             | LOG_05208                    | 0.999                                                           |                                               |
| KTC82281     | <i>L. cherrii</i>             | ORW            | Lche_0545         | 538    | DoSH1        | Arg415                | L22 (58-200)                                             | LOG_00141                    | 0.997                                                           |                                               |
| KTC82282     | <i>L. cherrii</i>             | ORW            | Lche_0546         | 317    | DoSH2        | Arg190                |                                                          | LOG_08605                    | 0.994                                                           |                                               |
| KTC92394     | <i>L. dumoffii</i>            | NY-23          | Ldum_0200         | 546    | DoSH         | Arg420                | L22 (59-206)                                             | LOG_00141                    | 0.997                                                           |                                               |
| KTD05240     | <i>L. gormanii</i>            | LS-13          | Lgor_0454         | 548    | DoSH         | Arg423                | L22 (58-208)                                             | LOG_00141                    | 0.996                                                           |                                               |
| CAH14223     | <i>L. pneumophila</i>         | Paris          | lpp3070           | 586    | DoSH         | Arg299, Arg461        |                                                          | N/A                          | N/A                                                             |                                               |
| KTD78494     | <i>L. steigerwaltii</i>       | SC-18-C9       | Lstg_1229         | 533    | DoSH1        | Arg411                | L22 (58-200)                                             | LOG_00141                    | 0.999                                                           |                                               |
| KTD78495     | <i>L. steigerwaltii</i>       | SC-18-C9       | Lstg_1230         | 548    | DoSH2        | Arg424                | L22 (59-206)                                             | LOG_00141                    | 0.997                                                           |                                               |
| KTC78335     | <i>L. brunensis</i>           | ATCC43878      | Lbru_2627         | 1013   | out-group    | Arg398, Arg608        | L60 (5-108), L57 (189-312)                               | LOG_04006                    | 1.000                                                           |                                               |
| KTD28480     | <i>L. micdadei</i>            | TATLOCK        | Lmic_1591         | 185    | out-group    | Arg61                 |                                                          | LOG_11994                    | 0.681                                                           |                                               |
| KTD30434     | <i>L. maceachernii</i>        | PX-1-G2-E2     | Lmac_0618         | 197    | out-group    | Arg78                 |                                                          | LOG_02977                    | 0.010                                                           |                                               |
| KTD45217     | <i>L. quinlivanii</i>         | CDC#1442-AUS-E | Lqui_2688         | 154    | out-group    | Arg61                 |                                                          | LOG_13428                    | 0.648                                                           |                                               |
| KTD82717     | <i>L. waltersii</i>           | ATCC51914      | Lwal_0459         | 99     | out-group    | Arg65                 |                                                          | LOG_14988                    | 0.757                                                           |                                               |
| WP_057624523 | <i>Coxiellaceae bacterium</i> | CC99           | Coxi_WP_057624523 | 283    | out-group    | Arg53                 |                                                          | N/A                          | N/A                                                             |                                               |

**Supplementary Table 2. Curve fitting statistics of in-solution peptide binding experiments**

|                   | <i>L. pneumophila</i><br>His-RavO SH2 | <i>L. longbeachae</i><br>His-LeSH | <i>L. longbeachae</i><br>His-LUSH SH2 | <i>L. pneumophila</i><br>His-DoSH C-SH2 | <i>L. dumoffii</i><br>LUSH (full length) | <i>L. drancourtii</i><br>His-LeSH4 SH2 |
|-------------------|---------------------------------------|-----------------------------------|---------------------------------------|-----------------------------------------|------------------------------------------|----------------------------------------|
| Shc1-pTyr239      | 0.22 ± 0.02                           | 7.15 ± 0.71                       | 0.30 ± 0.03                           | 0.40 ± 0.02                             | 0.13 ± 0.01                              | 0.55 ± 0.04                            |
| Shc1-pTyr317      | 1.14 ± 0.09                           | 6.71 ± 0.38                       | 0.68 ± 0.08                           | 0.64 ± 0.04                             | 0.40 ± 0.04                              | 1.58 ± 0.11                            |
| EGFR-pTyr954      | 3.66 ± 0.54                           | >50                               | 0.57 ± 0.03                           | 0.15 ± 0.01                             | 0.95 ± 0.04                              | 1.35 ± 0.14                            |
| EGFR-pTyr1086     | 7.06 ± 0.65                           | 20.37 ± 2.15                      | 1.64 ± 0.11                           | 12.49 ± 0.78                            | 0.18 ± 0.04                              | 1.04 ± 0.12                            |
| MidT-pTyr324      | 6.59 ± 0.54                           | 3.70 ± 0.29                       | 0.41 ± 0.04                           | 32.01 ± 7.66                            | 0.37 ± 0.02                              | 1.59 ± 0.15                            |
| GGpYGG            | 27.39 ± 2.77                          | 3.61 ± 0.31                       | 0.36 ± 0.04                           | 27.36 ± 3.97                            | 0.38 ± 0.05                              | 0.13 ± 0.01                            |
| IL2Rβ-pTyr387     | 7.57 ± 0.46                           | 0.91 ± 0.06                       | 0.36 ± 0.06                           | 22.96 ± 1.53                            | 0.28 ± 0.02                              | 2.00 ± 0.22                            |
| DnaJ-A1-pTyr381   | 19.21 ± 2.73                          | 0.53 ± 0.08                       | 0.24 ± 0.03                           | >50                                     | 0.35 ± 0.02                              | 0.81 ± 0.18                            |
| DnaJ-A1-pTyr381ΔN | 17.64 ± 1.12                          | 1.61 ± 0.10                       | 0.25 ± 0.02                           | 31.87 ± 2.99                            | 0.27 ± 0.01                              | 0.90 ± 0.04                            |
| DnaJ-A1-pTyr381ΔC | 15.23 ± 1.26                          | 2.75 ± 0.21                       | 0.55 ± 0.05                           | 12.29 ± 1.11                            | 0.20 ± 0.01                              | 1.12 ± 0.09                            |
| VCP-pTyr805-tail7 | 10.08 ± 1.20                          | 2.20 ± 0.24                       | 0.40 ± 0.05                           | 10.10 ± 1.58                            | 0.62 ± 0.11                              | 0.74 ± 0.12                            |
| VCP-pTyr805-tail2 | 9.38 ± 1.00                           | 0.99 ± 0.09                       | 0.81 ± 0.08                           | N/A                                     | N/A                                      | 0.12 ± 0.01                            |

  

|                   | <i>L. dumoffii</i><br>His-LeSH2 | <i>L. anisa</i><br>LeSH2a | <i>L. anisa</i><br>LeSH2b | <i>L. pneumophila</i><br>LeSH2 | <i>L. waltersii</i><br>LeSH5 tSH2 | His-Src SH2 wt | His-Src SH2 TrM<br>(superbinder) |
|-------------------|---------------------------------|---------------------------|---------------------------|--------------------------------|-----------------------------------|----------------|----------------------------------|
| Shc1-pTyr239      | 2.46 ± 0.19                     | 3.05 ± 0.26               | 38.07 ± 10.45             | 3.66 ± 0.43                    | 6.17 ± 0.84                       | 1.07 ± 0.15    | 0.017 ± 0.003                    |
| Shc1-pTyr317      | 9.35 ± 1.78                     | 0.94 ± 0.07               | 40.60 ± 5.63              | 8.77 ± 1.26                    | 13.79 ± 1.48                      | 2.81 ± 0.38    | 0.033 ± 0.007                    |
| EGFR-pTyr954      | >50                             | 7.98 ± 1.67               | >50                       | 44.62 ± 12.55                  | 6.20 ± 0.48                       | 13.26 ± 1.65   | 0.021 ± 0.002                    |
| EGFR-pTyr1086     | 14.70 ± 1.25                    | 4.45 ± 0.57               | >50                       | 31.38 ± 5.65                   | 33.52 ± 10.94                     | 10.88 ± 2.23   | 0.122 ± 0.013                    |
| MidT-pTyr324      | 1.23 ± 0.26                     | 0.42 ± 0.02               | 36.86 ± 11.10             | 1.32 ± 0.10                    | 5.11 ± 0.62                       | 0.27 ± 0.04    | 0.015 ± 0.005                    |
| GGpYGG            | 14.65 ± 1.82                    | 1.38 ± 0.14               | 35.20 ± 6.56              | 9.82 ± 0.79                    | >50                               | >50            | 1.497 ± 0.136                    |
| IL2Rβ-pTyr387     | 2.94 ± 0.21                     | 0.15 ± 0.01               | 4.00 ± 0.45               | 1.71 ± 0.10                    | 18.00 ± 1.35                      | 4.13 ± 0.31    | 0.402 ± 0.028                    |
| DnaJ-A1-pTyr381   | 1.12 ± 0.10                     | 0.57 ± 0.18               | 18.68 ± 3.49              | 0.16 ± 0.01                    | 29.18 ± 5.13                      | 5.17 ± 0.57    | 0.223 ± 0.017                    |
| DnaJ-A1-pTyr381ΔN | 0.71 ± 0.07                     | 0.55 ± 0.03               | 22.59 ± 1.20              | 0.10 ± 0.01                    | 14.98 ± 0.87                      | 2.57 ± 0.13    | 0.114 ± 0.007                    |
| DnaJ-A1-pTyr381ΔC | 5.26 ± 0.34                     | 0.34 ± 0.03               | 16.51 ± 1.68              | 1.09 ± 0.06                    | 28.66 ± 2.53                      | 10.22 ± 0.91   | 0.407 ± 0.025                    |
| VCP-pTyr805-tail7 | 9.10 ± 1.77                     | 2.53 ± 0.42               | 31.17 ± 11.12             | 0.81 ± 0.18                    | 42.56 ± 7.02                      | 9.77 ± 1.31    | 1.184 ± 0.199                    |
| VCP-pTyr805-tail2 | 7.43 ± 0.94                     | N/A                       | N/A                       | N/A                            | N/A                               | >50            | 1.786 ± 0.257                    |

  

|                   | <i>L. dumoffii</i><br>His-LeSH1a<br>D44S | <i>L. pneumophila</i><br>His-RavO SH2<br>T310A | <i>L. longbeachae</i><br>His-LeSH<br>P85A | <i>L. longbeachae</i><br>His-LeSH<br>R46K |
|-------------------|------------------------------------------|------------------------------------------------|-------------------------------------------|-------------------------------------------|
| Shc1-pTyr239      | >50                                      | 1.52 ± 0.12                                    | 14.95 ± 1.04                              | >50                                       |
| Shc1-pTyr317      | 20.68 ± 2.65                             | 2.68 ± 0.20                                    | 11.93 ± 0.72                              | >50                                       |
| MidT-pTyr324      | 45.41 ± 9.41                             | 11.23 ± 1.25                                   | 7.30 ± 0.67                               | >50                                       |
| GGpYGG            | >50                                      | >50                                            | 11.51 ± 0.57                              | >50                                       |
| IL2Rβ-pTyr387     | 21.13 ± 2.11                             | 24.16 ± 2.36                                   | 3.69 ± 0.27                               | 4.01 ± 0.30                               |
| DnaJ-A1-pTyr381   | >50                                      | 46.08 ± 7.34                                   | 1.64 ± 0.17                               | 3.03 ± 0.43                               |
| VCP-pTyr805-tail7 | >50                                      | 17.43 ± 2.53                                   | 5.85 ± 0.76                               | 43.22 ± 6.71                              |
| VCP-pTyr805-tail2 | >50                                      | 20.98 ± 2.96                                   | 4.29 ± 0.55                               | >50                                       |

Supplementary Table 3. Peptide array results on Array-1, probed with either GST-LeSH or the GST-RavO SH2 domain

| Spot | Sequence      | Spot intensity |          | Gene name                             | pTyr position | Relative SMALI score |             |           |
|------|---------------|----------------|----------|---------------------------------------|---------------|----------------------|-------------|-----------|
|      |               | LeSH           | RavO SH2 |                                       |               | Fyn SH2              | Grb2 SH2    | Cysteine? |
| A1   | EPQpYEEIPIYG  | 58             | 50       | Hamster polyomavirus middle-T antigen | 324           | <b>1.40</b>          | <b>1.05</b> |           |
| A2   | GGpYGGG       | 61             | 37       | GgpYGG                                | designed      | –                    | –           |           |
| A3   | DHqpYNDFFPGG  | 43             | 63       | Shc1 (*)                              | 239           | 0.72                 | <b>1.13</b> |           |
| A4   | HQYpYNDFFPGK  | 26             | 27       | Shc1 (*)                              | 240           | 0.40                 | 0.56        |           |
| A5   | DPSpYVNVQNLG  | 35             | 68       | Shc1 (*)                              | 317           | 0.96                 | <b>1.47</b> |           |
| A6   | EPQ YEEIPIYG  | 18             | 1        | non-phospho-A1                        | –             | –                    | –           |           |
| A7   | GG YGGG       | 19             | 1        | non-phospho-A2                        | –             | –                    | –           |           |
| A8   | DHq YNDFFPGG  | 19             | 1        | non-phospho-A3                        | –             | –                    | –           |           |
| A9   | HQY YNDFFPGK  | 23             | 0        | non-phospho-A4                        | –             | –                    | –           |           |
| A10  | DPS YVNVQNLG  | 18             | 1        | non-phospho-A5                        | –             | –                    | –           |           |
| A11  | PQRpYLVIQDGD  | 52             | 53       | EGFR (*)                              | 954           | 0.71                 | 0.62        |           |
| A12  | SNFpYRALMDEG  | 52             | 46       | EGFR (*)                              | 974           | 0.87                 | 0.66        |           |
| A13  | ADEpYLLIQQGG  | 66             | 72       | EGFR (*)                              | 992           | 0.54                 | 0.51        |           |
| A14  | LQRpYSSDPTGG  | 45             | 60       | EGFR (*)                              | 1045          | 0.32                 | 0.66        |           |
| A15  | VPEpYINQSVFG  | 20             | 73       | EGFR (*)                              | 1068          | 0.60                 | <b>1.49</b> |           |
| A16  | NPVpYHNQPLNG  | 30             | 58       | EGFR (*)                              | 1086          | 0.53                 | <b>1.20</b> |           |
| A17  | DPhpYQDPHSTG  | 25             | 29       | EGFR (*)                              | 1101          | 0.62                 | 0.63        |           |
| A18  | NPEpYLNVTQPG  | 36             | 65       | EGFR (*)                              | 1114          | 0.58                 | <b>1.45</b> |           |
| A19  | NPDPYQDDFFPG  | 76             | 52       | EGFR (*)                              | 1148          | 0.50                 | 0.67        |           |
| A20  | NAEpYLRVAPQG  | 26             | 48       | EGFR (*)                              | 1173          | 0.60                 | 0.83        |           |
| A21  | APepYENIRHYG  | 17             | 31       | FGD6; KIAA1362; ZFYVE24.              | 748           | <b>1.48</b>          | <b>1.38</b> |           |
| A22  | IRHpYEEIPEYG  | 20             | 32       | FGD6; KIAA1362; ZFYVE24.              | 754           | <b>1.33</b>          | 0.91        |           |
| A23  | FPIpYENVNPEG  | 19             | 56       | PTPRB; PTPB.                          | 1981          | <b>1.31</b>          | <b>1.54</b> |           |
| A24  | GEQpYEEPDSEG  | 27             | 47       | CD19.                                 | 409           | <b>1.25</b>          | 0.89        |           |
| A25  | NPDpYEPTRKGG  | 24             | 22       | CD3E; T3E.                            | 188           | <b>1.24</b>          | 0.71        |           |
| B1   | BHPpYELLTAG   | 81             | 52       | ANKS1A; ANKS1; KIAA00229.             | 454           | <b>1.16</b>          | <b>1.07</b> |           |
| B2   | DEEpYEVPLDGD  | 49             | 63       | PDE2A.                                | 920           | <b>1.15</b>          | 0.84        |           |
| B3   | TKLpYDMIALDLG | 20             | 34       | STRN3; GS2NA; SG2NA.                  | 374           | <b>1.13</b>          | 0.64        |           |
| B4   | CPHpYEKVSGDGD | 22             | 39       | EFNB2; EPLG5; HTKL; LERK5.            | 304           | <b>1.11</b>          | 0.96        | Yes       |
| B5   | CSMpYEDISRGG  | 75             | 60       | CD79A; IGA; MBI.                      | 199           | <b>1.11</b>          | 0.88        | Yes       |
| B6   | SYDpYDLIIIGG  | 47             | 51       | TXNRD1.                               | 13            | <b>1.09</b>          | 0.58        |           |
| B7   | TATpYEDIVTLG  | 74             | 65       | CD79B; B29; IGB.                      | 207           | <b>1.08</b>          | 0.97        |           |
| B8   | YAVpYETPTAHG  | 31             | 43       | TOLLIP.                               | 86            | <b>1.06</b>          | 0.76        |           |
| B9   | GDpYEFLLKSWG  | 31             | 20       | STK4; MST1.                           | 433           | <b>1.04</b>          | 0.70        |           |
| B10  | GHEpYTNIKYSG  | 30             | 18       | PTPN11; PTP2C; SHPTP2.                | 546           | <b>1.03</b>          | <b>1.18</b> |           |
| B11  | NKTPYETVASLGG | 49             | 50       | DDEF11; UPLC1.                        | 733           | <b>1.02</b>          | 0.84        |           |
| B12  | SQDpYDQLPSCG  | 42             | 50       | CSL; RNF56; Nbla00127.                | 889           | <b>1.01</b>          | 0.55        | Yes       |
| B13  | EIEpYENQKRLG  | 40             | 58       | FLT3; STK1.                           | 768           | 1.00                 | <b>1.25</b> |           |
| B14  | REApYEEPPQGG  | 71             | 63       | GPA33.                                | 281           | 0.99                 | 0.90        |           |
| B15  | PSEpYDLLWVPG  | 27             | 41       | ALS2CR19; PAR3B; PAR3L.               | 1056          | 0.98                 | 0.49        |           |
| B16  | DEVpYDDVDTSG  | 52             | 61       | FYB; SLAP130.                         | 651           | 0.98                 | 0.67        |           |
| B17  | NRpYDEDEDEEG  | 63             | 42       | LIMA1; EPLIN; SREBP3; PP62A.          | 752           | 0.97                 | 0.63        |           |
| B18  | ITIpYSTINHS   | 30             | 52       | SLAMF6; KALI; UNQ6123/PRO20080.       | 308           | 0.97                 | 0.71        |           |
| B19  | EDDpYESPNDGD  | 48             | 44       | LCP2.                                 | 113           | 0.96                 | 0.55        |           |
| B20  | KRPpYFTVDEAG  | 73             | 53       | PVRL1; HVEC; PRR1.                    | 468           | 0.95                 | 0.65        |           |
| B21  | RLLpYQNLNEFG  | 35             | 49       | AKAP9; AKAP350; AKAP450; KIAA0803.    | 3465          | 0.94                 | <b>1.38</b> |           |
| B22  | SQpYVTPNDSRG  | 50             | 45       | DOCK4; KIAA0716.                      | 821           | 0.94                 | <b>1.28</b> |           |
| B23  | APSpYLEISMSG  | 23             | 44       | GTF2I; BAP135; WBSR6.                 | 920           | 0.94                 | 0.93        |           |
| B24  | ESPpYQELQGGG  | 26             | 52       | TYROBP; DAP12; KARAP.                 | 91            | 0.93                 | 0.76        |           |
| B25  | EPHpYLVIDPRG  | 42             | 51       | ADCY4.                                | 444           | 0.93                 | 0.90        |           |
| C1   | EASpYVNLPTIG  | 50             | 61       | RPSA; LAMBR; LAMR1.                   | 138           | 0.90                 | <b>1.55</b> |           |
| C2   | QAQpYDTPKAGG  | 23             | 31       | DCBLD2; CLCP1; ESDN.                  | 732           | 0.89                 | 0.26        |           |
| C3   | ADEpYDQPBWEG  | 23             | 36       | SHB.                                  | 336           | 0.89                 | 0.34        |           |
| C4   | KDTPYDALHMQG  | 23             | 57       | CD247; CD3Z; T3Z; TCRZ.               | 153           | 0.88                 | 0.51        |           |
| C5   | PFHpYEDPNQAG  | 77             | 69       | EPHA4; HEK8; SEK.                     | 602           | 0.88                 | 0.69        |           |
| C6   | NTDpYTELHQGG  | 98             | 64       | GOLGA5; RETII; RFG5.                  | 42            | 0.88                 | 0.75        |           |
| C7   | DDLpYDQDDSRG  | 93             | 63       | LSR; LISCH.                           | 535           | 0.88                 | 0.57        |           |
| C8   | FEQpYVELPPIG  | 95             | 65       | CSF2RB; IL3RB; IL5RB.                 | 766           | 0.87                 | <b>1.04</b> |           |
| C9   | TSVpYTVTISGG  | 35             | 26       | PPP1R16B; ANKRD4; KIAA0823.           | 536           | 0.87                 | 0.59        |           |
| C10  | MEDpYDVHLQGG  | 54             | 29       | BCAR1; CAS; CRKAS.                    | 664           | 0.86                 | 0.53        |           |
| C11  | PTEpYASICVRG  | 27             | 21       | BTLA.                                 | 282           | 0.86                 | 0.76        | Yes       |
| C12  | GHEpYIVVDPMG  | 40             | 49       | PDGFRB.                               | 579           | 0.86                 | <b>1.01</b> |           |
| C13  | KFHpYDNTAGIG  | 52             | 55       | KDR; FLK1.                            | 1214          | 0.86                 | <b>1.09</b> |           |
| C14  | TPGpYVAPEVLG  | 28             | 72       | CAMK1.                                | 184           | 0.86                 | 0.86        |           |
| C15  | QGpYVALRLVG   | 33             | 43       | EPS15L1; EPS15R.                      | 74            | 0.85                 | 0.75        |           |
| C16  | EVTpYLAQLDHWG | 46             | 40       | LAIR1; CD305.                         | 251           | 0.84                 | 0.96        |           |
| C17  | GLEpYSGIQELG  | 47             | 52       | PKN2; PRK2; PRKCL2.                   | 635           | 0.84                 | 0.70        |           |
| C18  | QGDpYINLQTKG  | 25             | 64       | RAB7L1.                               | 190           | 0.84                 | <b>1.32</b> |           |
| C19  | EIPpYSEVKRQGG | 25             | 34       | CEACAM1; BGP; BGP1.                   | 520           | 0.84                 | 0.78        |           |
| C20  | DNIpYEWRSITIG | 31             | 25       | UBE2E3; UBCE4; UBCH9.                 | 91            | 0.84                 | 0.75        |           |
| C21  | DYDpYVHLQGGK  | 24             | 36       | NEDD9; CASL.                          | 631           | 0.83                 | 0.72        |           |
| C22  | KRSpYEEHLPYGG | 32             | 30       | INSR.                                 | 1355          | 0.83                 | 0.77        |           |
| C23  | AKApYDHLFKLGG | 17             | 21       | RAB13.                                | 5             | 0.83                 | 0.52        |           |
| C24  | GKDPYDPAARG   | 20             | 30       | MAPRE1.                               | 123           | 0.83                 | 0.52        |           |
| C25  | FDTPYEDPFLAG  | 61             | 63       | EPHA6; EHK2.                          | 611           | 0.82                 | 0.73        |           |
| D1   | NPVpYATLYMGG  | 34             | 19       | LRP1; A2MR.                           | 4507          | 0.80                 | 0.77        |           |
| D2   | ISRpYETSSSTSG | 33             | 50       | PPP1R12A; MBS; MYPT1.                 | 890           | 0.80                 | 0.73        |           |
| D3   | SFGpYDKPHVLG  | 23             | 47       | IFNGR1.                               | 457           | 0.80                 | 0.40        |           |
| D4   | NSDpYCGISEGG  | 32             | 46       | CASP8AP2; FLASH; KIAA1315; RIP25.     | 739           | 0.79                 | 0.61        | Yes       |
| D5   | IESpYQNLTRVG  | 72             | 54       | ABI1; SSH3BP1.                        | 22            | 0.79                 | <b>1.38</b> |           |
| D6   | DKEpYYSVHNKG  | 19             | 16       | MET.                                  | 1234          | 0.79                 | 0.55        |           |
| D7   | DGTPYETQGGK   | 28             | 18       | EPHA1; EPH; EPHT; EPHT1.              | 781           | 0.79                 | 0.80        |           |
| D8   | RGLpYDGPVCEG  | 37             | 42       | DPYSL2; CRMP2.                        | 499           | 0.79                 | 0.60        | Yes       |
| D9   | DPIpYEDRVYQGG | 57             | 35       | CTNND2; NPRAP.                        | 424           | 0.78                 | 0.83        |           |
| D10  | PHMpYEDAQLQGG | 81             | 41       | RGS17.                                | 171           | 0.78                 | 0.76        |           |
| D11  | VGPpYELGMEHG  | 17             | 27       | RPS6KB1.                              | 62            | 0.78                 | 0.93        |           |
| D12  | KSRpYSDLDPEG  | 80             | 53       | BAI3; KIAA0550.                       | 1419          | 0.78                 | 0.73        |           |
| D13  | MEPpYEAQRIMG  | 67             | 48       | SHB.                                  | 272           | 0.78                 | 0.67        |           |
| D14  | MIIPYSLKKEEG  | 21             | 38       | STAT1.                                | 106           | 0.78                 | 0.70        | Yes       |
| D15  | NVpYSEVRIIGG  | 50             | 46       | FCRL5; FCRH5; IRTA2; UNQ503/PRO820.   | 924           | 0.77                 | 0.84        |           |
| D16  | ETVpYSEVRRKAG | 35             | 35       | PECAM1.                               | 713           | 0.77                 | 0.77        |           |
| D17  | CPDpYDLCSVCG  | 14             | 20       | SQSTM1; ORCA.                         | 148           | 0.76                 | 0.54        | Yes       |
| D18  | TPGpYQAPEIRG  | 39             | 55       | LRRK1; KIAA1790.                      | 1453          | 0.76                 | 0.72        |           |
| D19  | AGHpYEDTLLKGG | 28             | 45       | ALK.                                  | 1604          | 0.76                 | 0.85        |           |
| D20  | GEApYEDDEHHG  | 48             | 47       | DNAJA1; DNAJ2; HDJ2; HSJ2; HSPF4.     | 381           | 0.75                 | 0.88        |           |
| D21  | LDGpYDRDDKEG  | 59             | 53       | ANP32A; C15orf1; LANP; MAPM; PHAP1.   | 148           | 0.75                 | 0.51        |           |
| D22  | LGVpYYSIPLVGG | 19             | 37       | PTPN22; PTPN8.                        | 526           | 0.75                 | 0.85        |           |
| D23  | EDIpYESSRHEIG | 56             | 56       | FRK.                                  | 387           | 0.75                 | 0.59        |           |
| D24  | ATLpYAVVENVG  | 21             | 57       | TNFRSF1A; TNFAR; TNFR1.               | 360           | 0.74                 | 0.93        |           |
| D25  | PQApYFTLPRNG  | 34             | 61       | DVL2.                                 | 362           | 0.74                 | 0.64        |           |

(\*) Residue numbers of Shc1 and EGFR follow the convention (van der Geer *et al.* 1996, *Curr Biol.*, 6(11):1435-44, Foley *et al.*, 2010, *Semin Cell Dev Biol.*, 21(9):951-60). The SMALI score > 1 is in bold.

Supplementary Table 4. Peptide array results on Array-2, probed with either GST-LeSH or the GST-RavO SH2 domain

| Spot | Sequence      | Spot intensity |          | Gene name                                       | pTyr position | Relative SMALI score |          |           |
|------|---------------|----------------|----------|-------------------------------------------------|---------------|----------------------|----------|-----------|
|      |               | LeSH           | RavO SH2 |                                                 |               | Fyn SH2              | Grb2 SH2 | Cysteine? |
| E1   | EPQpYEEIPIYG  | 57             | 63       | Hamster polyomavirus middle-T antigen           | 324           | 1.40                 | 1.05     |           |
| E2   | GGpYGGG       | 60             | 34       | GGpYGG                                          | designed      | -                    | -        |           |
| E3   | DHQpYNDPFGG   | 49             | 85       | Shc1 (*)                                        | 239           | 0.72                 | 1.13     |           |
| E4   | HQYpYNDPFGK   | 26             | 26       | Shc1 (*)                                        | 240           | 0.40                 | 0.56     |           |
| E5   | DFSpYVNVQNLG  | 28             | 92       | Shc1 (*)                                        | 317           | 0.96                 | 1.47     |           |
| E6   | EPQ YEEIPIYG  | 6              | 5        | non-phospho-A1                                  | -             | -                    | -        |           |
| E7   | GG YGGG       | 9              | 4        | non-phospho-A2                                  | -             | -                    | -        |           |
| E8   | DHQ YNDPFGG   | 12             | 5        | non-phospho-A3                                  | -             | -                    | -        |           |
| E9   | HQY YNDPFGK   | 18             | 4        | non-phospho-A4                                  | -             | -                    | -        |           |
| E10  | DPS YVNVQNLG  | 10             | 4        | non-phospho-A5                                  | -             | -                    | -        |           |
| E11  | PQRpYLVIQDGD  | 41             | 42       | EGFR (*)                                        | 954           | 0.71                 | 0.62     |           |
| E12  | SNFpYRALMDEG  | 58             | 16       | EGFR (*)                                        | 974           | 0.87                 | 0.66     |           |
| E13  | ADEpYVLPQGG   | 37             | 67       | EGFR (*)                                        | 992           | 0.54                 | 0.51     |           |
| E14  | LQRpYSSDPTGG  | 47             | 22       | EGFR (*)                                        | 1045          | 0.32                 | 0.66     |           |
| E15  | VPpYINQSVPG   | 24             | 72       | EGFR (*)                                        | 1068          | 0.60                 | 1.49     |           |
| E16  | NPVpYHNQPLNG  | 37             | 65       | EGFR (*)                                        | 1086          | 0.53                 | 1.20     |           |
| E17  | DPHpYQDPHSTG  | 24             | 21       | EGFR (*)                                        | 1101          | 0.62                 | 0.63     |           |
| E18  | NPEpYLNTPVQPG | 24             | 90       | EGFR (*)                                        | 1114          | 0.58                 | 1.45     |           |
| E19  | NDPpYQQDFPFG  | 70             | 62       | EGFR (*)                                        | 1148          | 0.50                 | 0.67     |           |
| E20  | NAEpYLRVAPQG  | 72             | 65       | EGFR (*)                                        | 1173          | 0.60                 | 0.83     |           |
| E21  | EILpYVNMDEGG  | 64             | 93       | AXL; UFO.                                       | 814           | 0.86                 | 1.67     |           |
| E22  | SNFpYENSLIPG  | 61             | 65       | EPOR.                                           | 489           | 1.06                 | 1.58     |           |
| E23  | ADSpYENMDNPG  | 56             | 32       | CD19.                                           | 531           | 1.01                 | 1.53     |           |
| E24  | SREpYVNVSQEG  | 72             | 92       | LAT.                                            | 220           | 0.89                 | 1.51     |           |
| E25  | DKVpYENVTLGL  | 18             | 25       | PTK2; FAK; FAK1.                                | 925           | 1.13                 | 1.47     |           |
| F1   | AALpYKMLLHSG  | 16             | 10       | KIT.                                            | 703           | 0.83                 | 1.37     |           |
| F2   | SADpYMNLFHFG  | 29             | 25       | UNC13B; UNC13.                                  | 1033          | 0.83                 | 1.35     |           |
| F3   | QNGpYENPTYK   | 30             | 17       | APP; A4; AD1.                                   | 757           | 1.22                 | 1.33     |           |
| F4   | DPYpYGNDSDFG  | 62             | 43       | ACPI.                                           | 132           | 0.65                 | 1.30     |           |
| F5   | SQpYTNPDSDRG  | 64             | 44       | DOCK4; KIAA0716.                                | 821           | 0.94                 | 1.28     |           |
| F6   | DSVpYANWMLSG  | 49             | 16       | RET.                                            | 1096          | 0.46                 | 1.27     |           |
| F7   | DQApYANSQPAG  | 36             | 20       | SIT1; SIT.                                      | 188           | 0.47                 | 1.25     |           |
| F8   | SSDpYINANYIG  | 59             | 81       | PTPRK; PTPK.                                    | 940           | 0.51                 | 1.24     |           |
| F9   | ERDpYTNLPSGG  | 84             | 64       | CSF1R; FMS.                                     | 923           | 0.81                 | 1.23     |           |
| F10  | AMFpYTNRLVKG  | 49             | 26       | CAP1; CAP.                                      | 163           | 0.56                 | 1.22     |           |
| F11  | EDMpYTNQSPAG  | 47             | 31       | MPP1; DXS552E; EMP55.                           | 48            | 0.41                 | 1.21     |           |
| F12  | MAPpYDNYVPSG  | 30             | 27       | PDGFRB.                                         | 775           | 0.82                 | 1.19     |           |
| F13  | DSpYENTQSGG   | 55             | 33       | GIT1.                                           | 598           | 0.98                 | 1.16     |           |
| F14  | EDCpYGYNDNLG  | 66             | 57       | PDPK1; PDK1.                                    | 373           | 0.59                 | 1.16     | Yes       |
| F15  | SNIpYVEVEDEG  | 83             | 93       | SH2D2A; SCAP; TSAD; VRAP.                       | 305           | 1.11                 | 1.12     |           |
| F16  | RDpYKNDPQYV   | 18             | 34       | FLT1; FLT; FRT.                                 | 1048          | 0.85                 | 1.11     |           |
| F17  | AMEpYYNWGRFG  | 24             | 37       | LAT2; LAB; NTAL; WBS15; WBSR15; WBSR5; HSPC046. | 118           | 0.70                 | 1.10     |           |
| F18  | NLPpYVQILKGT  | 38             | 79       | FGFR1; FGFR; FLG; FLT2.                         | 307           | 0.95                 | 1.08     |           |
| F19  | GPVpYIGELPQG  | 54             | 79       | TOLLIP.                                         | 13            | 0.32                 | 1.08     |           |
| F20  | SEVpYEMVKCG   | 53             | 42       | PDGFRA.                                         | 926           | 0.64                 | 1.06     | Yes       |
| F21  | QGSpYVFLLRDGD | 94             | 100      | LSR; LISCH.                                     | 372           | 0.68                 | 1.05     |           |
| F22  | CVVpYEDMSHSG  | 91             | 69       | CD7.                                            | 222           | 0.70                 | 1.04     | Yes       |
| F23  | NPDpYWNHSLPG  | 39             | 52       | ERBB4; HER4.                                    | 1242          | 0.55                 | 1.03     |           |
| F24  | PHTpYQNRPPFG  | 65             | 33       | FLT3; STK1.                                     | 969           | 0.46                 | 1.03     |           |
| F25  | PLVpYVIVGKRC  | 9              | 21       | BKRRB2; BKR2.                                   | 332           | 0.66                 | 1.02     |           |
| G1   | HNEpYVRDLVPG  | 86             | 78       | UNC13B; UNC13.                                  | 1047          | 0.56                 | 0.98     |           |
| G2   | IDVpYIMVKCG   | 38             | 17       | EGFR(*)                                         | 920           | 0.20                 | 0.97     | Yes       |
| G3   | NLEpYVSVSPTG  | 80             | 74       | SLAMF6; KALI; UNQ6123/PRO20080.                 | 273           | 0.75                 | 0.96     |           |
| G4   | GSpYEEEEEEG   | 81             | 30       | PVRL1; HVEC; PRR1.                              | 436           | 0.99                 | 0.96     |           |
| G5   | ENPpYSEVGKIG  | 60             | 13       | SHANK2; KIAA1022.                               | 393           | 0.95                 | 0.96     |           |
| G6   | AELpYKELPQGG  | 23             | 7        | TEK; TIE2.                                      | 1048          | 1.04                 | 0.96     |           |
| G7   | SQApYEVLSADAG | 52             | 36       | DNAJA1; DNAJ2; HDJ2; HSJ2; HSPF4.               | 52            | 1.02                 | 0.95     |           |
| G8   | NLSpYTEILKIG  | 76             | 84       | ELMO1; KIAA0281.                                | 511           | 0.87                 | 0.95     |           |
| G9   | SVMpYVVPQMG   | 44             | 45       | OR7G1.                                          | 278           | 0.57                 | 0.95     |           |
| G10  | TPIpYLDILGG   | 81             | 86       | NTRK3; TRKC.                                    | 834           | 0.78                 | 0.94     |           |
| G11  | ATLpYAVVENVG  | 41             | 41       | TNFRSF1A; TNFAR; TNFR1.                         | 360           | 0.74                 | 0.93     |           |
| G12  | RDPpYIIVTQRC  | 76             | 85       | AHR.                                            | 378           | 0.66                 | 0.93     |           |
| G13  | SADpYVLSVRDGD | 88             | 95       | PTK6; BRK.                                      | 114           | 0.43                 | 0.93     |           |
| G14  | YDPpYSEEDPDG  | 78             | 47       | IL2RB.                                          | 387           | 0.73                 | 0.93     |           |
| G15  | EPVpYSMEAADG  | 55             | 51       | CTTN; EMS1.                                     | 446           | 0.50                 | 0.93     |           |
| G16  | TAApYQELCRQG  | 58             | 20       | PTPRN2.                                         | 666           | 0.80                 | 0.92     | Yes       |
| G17  | PGPpYVQAGTG   | 11             | 58       | CTNND1; KIAA0384.                               | 193           | 0.45                 | 0.92     |           |
| G18  | QDpYEVVFPNG   | 62             | 67       | PLEKHB1; KPL1; PHR1.                            | 176           | 1.05                 | 0.92     |           |
| G19  | SVPpYALVTPMG  | 56             | 63       | OR2D2; OR2D1.                                   | 276           | 0.69                 | 0.91     |           |
| G20  | AEApYSEIGMKG  | 25             | 15       | CD247; CD3Z; T3Z; TCRZ.                         | 123           | 0.87                 | 0.91     |           |
| G21  | DLQpYITVSKEG  | 53             | 96       | MLLT4; AF6.                                     | 1480          | 0.63                 | 0.91     |           |
| G22  | DGpYMDMSKDG   | 33             | 17       | PDGFRB.                                         | 740           | 0.22                 | 0.90     |           |
| G23  | DVpYLVKAVPG   | 0              | 5        | DLG4; PSD95.                                    | 240           | 0.54                 | 0.90     |           |
| G24  | TRSpYVLLSFG   | 57             | 27       | PDGFRA.                                         | 720           | 0.69                 | 0.90     |           |
| G25  | FRSpYEDLKWG   | 43             | 9        | FLT3; STK1.                                     | 597           | 0.77                 | 0.90     |           |
| H1   | RFIpYEFHFHNG  | 100            | 95       | PPP2R5B.                                        | 244           | 0.78                 | 0.88     |           |
| H2   | FGLpYSKTMTFG  | 23             | 7        | PLEKHC1; KIND2; MIG2.                           | 185           | 0.40                 | 0.88     |           |
| H3   | VNGpYVMPDTHG  | 45             | 84       | ERBB3; HER3.                                    | 1159          | 0.99                 | 0.88     |           |
| H4   | GEApYEDDEHHG  | 74             | 42       | DNAJA1; DNAJ2; HDJ2; HSJ2; HSPF4.               | 381           | 0.75                 | 0.88     |           |
| H5   | DGLpYQGLSTAG  | 38             | 24       | CD247; CD3Z; T3Z; TCRZ.                         | 142           | 0.67                 | 0.87     |           |
| H6   | RLIpYEDYVSLG  | 72             | 80       | RGS19; GAIP; GNAI3IP.                           | 143           | 0.68                 | 0.87     |           |
| H7   | HRIpYSYVSRG   | 40             | 12       | UBXD8; ETEA; KIAA0887.                          | 79            | 0.59                 | 0.87     |           |
| H8   | EVEpYSTVASPG  | 36             | 10       | CD300A; CMRF35H.                                | 255           | 0.81                 | 0.87     |           |
| H9   | SDPpYALVSLFG  | 76             | 20       | DYSF; FERL1.                                    | 1176          | 0.59                 | 0.87     |           |
| H10  | AKLpYSLVIWGG  | 15             | 5        | BKRRB2; BKR2.                                   | 177           | 0.60                 | 0.87     |           |
| H11  | DDQpYVSSVGTG  | 59             | 35       | BMX.                                            | 566           | 0.39                 | 0.87     |           |
| H12  | VNPpYSEAEIKG  | 81             | 18       | EPN2; KIAA1065.                                 | 17            | 0.77                 | 0.86     |           |
| H13  | EEVpYVXHMNG   | 14             | 5        | FLNC; ABPL; FLN2.                               | 2683          | 0.38                 | 0.86     |           |
| H14  | KDpYTELSTAG   | 82             | 26       | MRIP; KIAA0864; RHOP3.                          | 944           | 0.84                 | 0.85     |           |
| H15  | TFDpYILCMDEG  | 75             | 85       | ACPI.                                           | 87            | 0.41                 | 0.85     | Yes       |
| H16  | KLpYAKDIPGT   | 9              | 9        | PLXNC1; VESPR.                                  | 1471          | 0.32                 | 0.85     |           |
| H17  | NVSpYEHSPFKG  | 30             | 43       | GPR126.                                         | 1196          | 0.73                 | 0.85     |           |
| H18  | EELpYSKVTPRG  | 35             | 10       | STSI; KIAA1959.                                 | 19            | 0.62                 | 0.85     |           |
| H19  | GEVpYEGVWKKG  | 4              | 5        | ABL1; ABL; JTK7.                                | 257           | 0.93                 | 0.85     |           |
| H20  | EGDpYMLVPRRG  | 70             | 31       | BAI2.                                           | 1339          | 0.61                 | 0.85     |           |
| H21  | QCPpYETINRIG  | 79             | 71       | GD12; RABGDIB.                                  | 203           | 1.39                 | 0.84     | Yes       |
| H22  | NKTpYETVASLG  | 75             | 31       | DDEF11; UPLC1.                                  | 733           | 1.02                 | 0.84     |           |
| H23  | STpYAAVARHG   | 74             | 20       | LAIR1; CD305.                                   | 281           | 0.59                 | 0.84     |           |
| H24  | SKYpYTPVLAKG  | 9              | 2        | STAT5A; STAT5.                                  | 683           | 0.62                 | 0.84     |           |
| H25  | KIRpYESLZDGP  | 60             | 24       | HSP90A1; HSP90B; HSPC2; HSPCB.                  | 55            | 1.12                 | 0.84     |           |

(\*) Residue numbers of Shc1 and EGFR follow the convention (van der Geer et al. 1996, *Curr Biol.*, 6(11):1435-44, Foley et al., 2010, *Semin Cell Dev Biol.*, 21(9):951-60). The SMALI score > 1 is in bold.

**Supplementary Table 5. Z-scores from spot intensities probed with GST-LeSH.** The sequences are sorted by the Z-score. Z-scores above 0.6 are in bold. The intensities are averaged for the 24 pairs of replicate peptides in the two membranes. Non-phosphorylated peptides are excluded.

| Spot (non-redundant, Cys-less) | Peptide sequence | Intensity | Z-score      | Spot (non-redundant, Cys-less) | Peptide sequence | Intensity | Z-score |
|--------------------------------|------------------|-----------|--------------|--------------------------------|------------------|-----------|---------|
| H1                             | RFIPYEFHFNG      | 100       | <b>2.368</b> | H3                             | VNGPYVMPDTHG     | 45        | -0.044  |
| C6                             | NTDPYTELHQGG     | 98        | <b>2.281</b> | G9                             | SVMPYTVVPMGM     | 44        | -0.088  |
| C8                             | FEQYVELPPIG      | 95        | <b>2.149</b> | G25                            | FRPEYEVDLKKG     | 43        | -0.132  |
| F21                            | QGSPPYVLLRDLG    | 94        | <b>2.105</b> | B25                            | EPTPYLVLDPRG     | 42        | -0.175  |
| C7                             | DDLpYDQDDSRG     | 93        | <b>2.061</b> | B13                            | EIEPYENQKRLG     | 40        | -0.263  |
| G13                            | SADpYVLSVRDG     | 88        | <b>1.842</b> | C12                            | GHEPYIYVDFPMG    | 40        | -0.263  |
| G1                             | HNEPYVRDLFVPG    | 86        | <b>1.754</b> | H7                             | HRIpYSYVVSRRG    | 40        | -0.263  |
| F9                             | ERDPYTNLPSSG     | 84        | <b>1.667</b> | D18                            | TFGpYQAPEIRG     | 39        | -0.307  |
| F15                            | SNIPYVEVEDEG     | 83        | <b>1.623</b> | F23                            | NPDpYWNHSLPG     | 39        | -0.307  |
| H14                            | KDIPYTELSIAG     | 82        | <b>1.579</b> | F18                            | NLPpYVQILKTG     | 38        | -0.351  |
| B1                             | EHPpYEELLTAG     | 81        | <b>1.535</b> | H5                             | DGLpYQGLSTAG     | 38        | -0.351  |
| D10                            | PHMpYEDAQLQG     | 81        | <b>1.535</b> | F7                             | DQApYANSQPAG     | 36        | -0.439  |
| G4                             | GSSpYEEEEEEG     | 81        | <b>1.535</b> | H8                             | EVepYSTVASPG     | 36        | -0.439  |
| G10                            | TPIPYLDILGG      | 81        | <b>1.535</b> | B21                            | RILpYQNLNEPG     | 35        | -0.482  |
| H12                            | VNNpYSEAEIKG     | 81        | <b>1.535</b> | C9                             | TSVpYYTTSVSGG    | 35        | -0.482  |
| D12                            | KSRpYSLDLDFEG    | 80        | <b>1.491</b> | D16                            | ETVpYSEVRKAG     | 35        | -0.482  |
| G3                             | NLEpYVSVSPTG     | 80        | <b>1.491</b> | H18                            | EELpYSKVTPRG     | 35        | -0.482  |
| G14                            | YDPpYSEEDPDG     | 78        | <b>1.404</b> | D1                             | NFVpYATLYMGG     | 34        | -0.526  |
| C5                             | PFTpYEDPNQAG     | 77        | <b>1.360</b> | D25                            | PQApYFTLPRNG     | 34        | -0.526  |
| G8                             | NLSpYTEILKIG     | 76        | <b>1.316</b> | <A16 = E16>                    | NFVpYHNQPLNG     | 33        | -0.570  |
| G12                            | RPDPYIIVTQRG     | 76        | <b>1.316</b> | C15                            | QGFpYVALRLVG     | 33        | -0.570  |
| H9                             | SDPpYAIVSFLG     | 76        | <b>1.316</b> | D2                             | ISRpYETSSTSG     | 33        | -0.570  |
| B7                             | TATpYEDIVTLG     | 74        | <b>1.228</b> | G22                            | DGGpYMDMSKDG     | 33        | -0.570  |
| H23                            | SITpYAAVARHG     | 74        | <b>1.228</b> | C22                            | KRSpYEEHIPYG     | 32        | -0.614  |
| <A19 = E19>                    | NFPpYQQDFPPG     | 73        | <b>1.184</b> | <A5 = E5>                      | DPSpYVNVQNLG     | 31        | -0.658  |
| B20                            | KRPpYFTVDEAG     | 73        | <b>1.184</b> | <D24 = G11>                    | ATLpYAVVENVG     | 31        | -0.658  |
| D5                             | IESpYQNLTRVG     | 72        | <b>1.140</b> | B8                             | YAVpYETPTAHG     | 31        | -0.658  |
| E24                            | SREpYVNVSQEG     | 72        | <b>1.140</b> | B9                             | DGDpYEFLLKSWG    | 31        | -0.658  |
| H6                             | RLIPYEDYVSIIG    | 72        | <b>1.140</b> | C20                            | DNIPYEWRSITIG    | 31        | -0.658  |
| B14                            | REApYEEPEEQG     | 71        | <b>1.096</b> | <A18 = E18>                    | NPEpYLVTVQPG     | 30        | -0.702  |
| H20                            | EGDPYMLVPRRG     | 70        | <b>1.053</b> | B10                            | GHEpYTNIKYSG     | 30        | -0.702  |
| D13                            | MEPpYEAQRIMG     | 67        | <b>0.921</b> | B18                            | ITIPYSTINHSG     | 30        | -0.702  |
| F24                            | PHTpYQNRFFPG     | 65        | <b>0.833</b> | F3                             | QNGpYENPTYKGG    | 30        | -0.702  |
| E21                            | EILpYVNMDEGG     | 64        | <b>0.789</b> | F12                            | MAPPYDNYVPSG     | 30        | -0.702  |
| B17                            | NRYpYDEDEDEG     | 63        | <b>0.746</b> | H17                            | NVSpYEHSPFKG     | 30        | -0.702  |
| <B11 = H22>                    | NKTpYETVASLG     | 62        | <b>0.702</b> | F2                             | SADpYMNLFHFKG    | 29        | -0.746  |
| F4                             | DPYpYGNDSDFG     | 62        | <b>0.702</b> | C14                            | TPGpYVAPEVLG     | 28        | -0.789  |
| G18                            | QDYpYEVVPPNG     | 62        | <b>0.702</b> | D7                             | DGTpYETQGGKG     | 28        | -0.789  |
| <D20 = H4>                     | GEApYEDDEHHG     | 61        | <b>0.658</b> | D19                            | AGHpYEDTILKGG    | 28        | -0.789  |
| C25                            | PDTpYEDPDLG      | 61        | <b>0.658</b> | A24                            | GEGpYEEPDSEG     | 27        | -0.833  |
| E22                            | SNPpYENSLIPG     | 61        | <b>0.658</b> | B15                            | PSEpYDLLWVPG     | 27        | -0.833  |
| <A2 = E2>                      | GGpYGGG          | 60        | <b>0.614</b> | <A4 = E4>                      | HQYpYNDFPKGG     | 26        | -0.877  |
| G5                             | ENPpYSEVGKIG     | 60        | <b>0.614</b> | B24                            | ESPpYQELQGGG     | 26        | -0.877  |
| H25                            | KIRpYESLTDPG     | 60        | <b>0.614</b> | C18                            | QGDpYINLQTKG     | 25        | -0.921  |
| D21                            | LDGpYDRDDKEG     | 59        | 0.570        | C19                            | EIIpYSEVKKQG     | 25        | -0.921  |
| F8                             | SSDPYINANYIG     | 59        | 0.570        | G20                            | AEApYSEIGMKG     | 25        | -0.921  |
| H11                            | DDQpYVSSVGTG     | 59        | 0.570        | <A17 = E17>                    | DPHpYQDPHSTG     | 24        | -0.965  |
| <A1 = E1>                      | EPQpYEEIPIYG     | 58        | 0.526        | A25                            | NPDpYEPIRKGG     | 24        | -0.965  |
| <B22 = F5>                     | SQLpYTNPDSRG     | 57        | 0.482        | C21                            | DYDpYVHLQGGG     | 24        | -0.965  |
| D9                             | DPIpYEDRVYQG     | 57        | 0.482        | F17                            | AMEpYYNWGRFG     | 24        | -0.965  |
| G24                            | TRSpYVILSFEG     | 57        | 0.482        | B23                            | APSpYLEISSMG     | 23        | -1.009  |
| D23                            | EDIpYESRHEIG     | 56        | 0.439        | C2                             | QAQpYDTPKAGG     | 23        | -1.009  |
| E23                            | ADSpYENMDNPG     | 56        | 0.439        | C3                             | ADEpYDQPWEWG     | 23        | -1.009  |
| G19                            | SVFPYAIVTFMG     | 56        | 0.439        | C4                             | KDTPYDALHMGG     | 23        | -1.009  |
| <A12 = E12>                    | SNFPYRALMDEG     | 55        | 0.395        | D3                             | SFGpYDKPHVLG     | 23        | -1.009  |
| F13                            | DSDpYENTQSGG     | 55        | 0.395        | G6                             | AELpYKLPQGG      | 23        | -1.009  |
| G15                            | EPVpYSMEAADG     | 55        | 0.395        | H2                             | PGLpYSKTMTPG     | 23        | -1.009  |
| C10                            | MEDpYDYVHLQG     | 54        | 0.351        | <A15 = E15>                    | VPEpYINQSVPG     | 22        | -1.053  |
| F19                            | GFVpYIGELPQG     | 54        | 0.351        | A22                            | IRHpYEEIPEYGG    | 20        | -1.140  |
| G21                            | DLQpYITVSKEG     | 53        | 0.307        | B3                             | TKLpYDMIAADLG    | 20        | -1.140  |
| B16                            | DEVpYDDVDVTSG    | 52        | 0.263        | C24                            | GKDpYDVPVAARG    | 20        | -1.140  |
| C13                            | KFHpYDNTAGIG     | 52        | 0.263        | A23                            | FFIPYENVNPEG     | 19        | -1.184  |
| G7                             | SQApYEVLSDAG     | 52        | 0.263        | D6                             | DKEpYYSVHNKG     | 19        | -1.184  |
| <A13 = E13>                    | ADEpYLIPOQGG     | 51        | 0.219        | D22                            | LGVPYYSYIPLVG    | 19        | -1.184  |
| C1                             | EASpYVNLPTIG     | 50        | 0.175        | E25                            | DKVpYENVTGLG     | 18        | -1.228  |
| D15                            | NVVPYSEVRIIG     | 50        | 0.175        | F16                            | RDIpYKPNPDYVG    | 18        | -1.228  |
| <A20 = E20>                    | NAEpYLRVAFQGG    | 49        | 0.132        | A21                            | APEpYENIRHYG     | 17        | -1.272  |
| B2                             | DEEpYEVDFDLG     | 49        | 0.132        | C23                            | AKApYDHLFKLG     | 17        | -1.272  |
| F6                             | DSVPYANWMLSG     | 49        | 0.132        | D11                            | VGPpYELGMEHG     | 17        | -1.272  |
| F10                            | AMFPYTNRVLKG     | 49        | 0.132        | F1                             | AALpYKNLHLSG     | 16        | -1.316  |
| B19                            | EDDPYESPNDG      | 48        | 0.088        | H10                            | AKLpYSLVIWGG     | 15        | -1.360  |
| <A11 = E11>                    | PQRpYLVIQDGG     | 47        | 0.044        | H13                            | EEVpYVKHMGG      | 14        | -1.404  |
| B6                             | SYDPYDLIIIGG     | 47        | 0.044        | G17                            | PGPpYVVGAGTGG    | 11        | -1.535  |
| C17                            | GLEpYSGIQELG     | 47        | 0.044        | F25                            | PLVpYVIVGKRG     | 9         | -1.623  |
| F11                            | EDMpYTNNGSPAG    | 47        | 0.044        | H16                            | KLlpYAKDLPTG     | 9         | -1.623  |
| <A3 = E3>                      | DHQPYNDFPFG      | 46        | 0.000        | H24                            | SKYpYTPVLAKG     | 9         | -1.623  |
| <A14 = E14>                    | LQRpYSSDPTGG     | 46        | 0.000        | H19                            | GEVpYEGVWKKG     | 4         | -1.842  |
| C16                            | EVTpYAQLDHWG     | 46        | 0.000        | G23                            | DVVpYLVKAPKG     | 0         | -2.018  |

**Supplementary Table 6. Z-scores from spot intensities probed with GST-RavO SH2.** The sequences are sorted by the Z-score. Z-scores above 0.6 are in bold. The intensities are averaged for the 24 pairs of replicate peptides in the two membranes. Non-phosphorylated peptides are excluded.

| Spot (non-redundant, Cys-less) | Peptide sequence | Intensity | Z-score      | Spot (non-redundant, Cys-less) | Peptide sequence | Intensity | Z-score |
|--------------------------------|------------------|-----------|--------------|--------------------------------|------------------|-----------|---------|
| F21                            | QGSpyVPLLRDG     | 100       | <b>2.414</b> | F4                             | DPYpYGNDSDFG     | 43        | -0.037  |
| G21                            | DLQpYITVSKEG     | 96        | <b>2.256</b> | C15                            | QGFpYVALRLVG     | 43        | -0.047  |
| H1                             | RFIpyEFEHFNG     | 95        | <b>2.212</b> | H17                            | NVSpYEHFNFNG     | 43        | -0.051  |
| G13                            | SADpYVLSVRDG     | 95        | <b>2.194</b> | B8                             | YAVpYETPTAHG     | 43        | -0.053  |
| E21                            | EILpYVNMDEGG     | 93        | <b>2.111</b> | B17                            | NRYPYDEDEDEG     | 42        | -0.068  |
| F15                            | SNIpYVEVEDEG     | 93        | <b>2.094</b> | B15                            | PSEpYDLLWVPG     | 41        | -0.122  |
| E24                            | SREpYVNVSQEG     | 92        | <b>2.053</b> | <A14 = E14>                    | LQRpYSSDPTGG     | 41        | -0.124  |
| G10                            | TFIpyYLDILGG     | 86        | <b>1.831</b> | D10                            | PHMpYEDAQLQG     | 41        | -0.144  |
| G12                            | RPDpYIIVTQRG     | 85        | <b>1.772</b> | <B11 = H22>                    | NKTpYETVASLG     | 41        | -0.150  |
| H3                             | VNGpYVMPDTHG     | 84        | <b>1.736</b> | C16                            | EVTpYQLDHWG      | 40        | -0.189  |
| G8                             | NLSpYTEILKIG     | 84        | <b>1.732</b> | F17                            | AMEpYYNWGRFG     | 37        | -0.312  |
| F8                             | SSDpYINANYIG     | 81        | <b>1.605</b> | D22                            | LGVPYYSYIPLVG    | 37        | -0.322  |
| H6                             | RLIpyYEDYVSI     | 80        | <b>1.560</b> | C3                             | ADEpYDQPWEWG     | 36        | -0.345  |
| <A5 = E5>                      | DPSpYVNVQNLG     | 80        | <b>1.537</b> | C21                            | DYDpYVHLQGG      | 36        | -0.354  |
| F19                            | GPVpYIGELPQG     | 79        | <b>1.526</b> | G7                             | SQApyEVLSDAG     | 36        | -0.365  |
| F18                            | NLPpYVQILKGT     | 79        | <b>1.510</b> | <A2 = E2>                      | GGpYGGG          | 35        | -0.370  |
| G1                             | HNEpYVRDLFVG     | 78        | <b>1.477</b> | D9                             | DPIpYEDRVYQG     | 35        | -0.372  |
| <A18 = E18>                    | NPEpYLNVTQPG     | 77        | <b>1.428</b> | H11                            | DDQpYVSSVGTG     | 35        | -0.376  |
| <A3 = E3>                      | DHQpYYNDFPFG     | 74        | <b>1.301</b> | D16                            | ETVpYSEVRKAG     | 35        | -0.404  |
| G3                             | NLEpYVSVSPTG     | 74        | <b>1.277</b> | C19                            | EIIpYSEVKKVG     | 34        | -0.410  |
| <A15 = E15>                    | VPEpYINQSVPG     | 73        | <b>1.234</b> | F16                            | RDIpYKNPDYVG     | 34        | -0.415  |
| C14                            | TFGpYVAPEVLG     | 72        | <b>1.222</b> | B3                             | TKLpYDMIADLG     | 34        | -0.425  |
| <A13 = E13>                    | ADEpYLIPIQQGG    | 70        | <b>1.105</b> | F24                            | PHTpYQNRPFPG     | 33        | -0.456  |
| C5                             | PFTpYEDPNQAG     | 69        | <b>1.061</b> | F13                            | DSDPYENTQSGG     | 33        | -0.470  |
| G18                            | QDYpYEVVPPNG     | 67        | <b>0.992</b> | E23                            | ADSpYENMDNPG     | 32        | -0.501  |
| C8                             | FEgpYVELPPIG     | 65        | <b>0.920</b> | A22                            | IRHpYEEIPEYG     | 32        | -0.534  |
| E22                            | SNPpYENSLIPG     | 65        | <b>0.905</b> | C2                             | QAQpYDTPKAGG     | 31        | -0.540  |
| B7                             | TATpYEDIVTLG     | 65        | <b>0.894</b> | H20                            | EGDpYVMVLRGG     | 31        | -0.564  |
| C18                            | QGDpYINLQTKG     | 64        | <b>0.858</b> | <A12 = E12>                    | SNFpYRALMDEG     | 31        | -0.565  |
| F9                             | ERDpYTNLPSSG     | 64        | <b>0.848</b> | A21                            | APepYENIRHYG     | 31        | -0.567  |
| C6                             | NTPpYTELHQGG     | 64        | <b>0.847</b> | F11                            | EDMpYTNQSPAG     | 31        | -0.570  |
| B14                            | REApYEEPPPEQG    | 63        | <b>0.839</b> | G4                             | GSSpYEEEEEEG     | 30        | -0.582  |
| C25                            | PDTpYEDPSLAG     | 63        | <b>0.826</b> | C24                            | GKDPYDPAARG      | 30        | -0.607  |
| B2                             | DEEpYEVPLDGG     | 63        | <b>0.823</b> | C22                            | KRSpYEEHIPYG     | 30        | -0.623  |
| G19                            | SVFpYAIVTPMG     | 63        | <b>0.817</b> | C10                            | MEDpYDYVHLQG     | 29        | -0.638  |
| C7                             | DDLpYDQDSDRG     | 63        | <b>0.798</b> | F12                            | MAPpYDNVYVPSG    | 27        | -0.728  |
| <A16 = E16>                    | NPVpYHNQPLNG     | 61        | <b>0.753</b> | D11                            | VGPpYELGMEHG     | 27        | -0.740  |
| B16                            | DEVpYDDVDTSG     | 61        | <b>0.738</b> | <A4 = E4>                      | HQYpYNDPFGKG     | 27        | -0.745  |
| D25                            | PQApYFTLPRNG     | 61        | <b>0.729</b> | G24                            | TRSpYVLLSFEG     | 27        | -0.752  |
| C1                             | EASpYVNLPTIG     | 61        | <b>0.713</b> | C9                             | TSVpYTVTSTGG     | 26        | -0.756  |
| B13                            | EIEpYENQKRLG     | 58        | <b>0.623</b> | H14                            | KDIpYTELSIAG     | 26        | -0.779  |
| G17                            | PGPpYVQGAGTG     | 58        | <b>0.607</b> | F10                            | AMFpYTNRVLKG     | 26        | -0.792  |
| C4                             | KDTpYDALHMGG     | 57        | 0.576        | E25                            | DKVpYENVTGLG     | 25        | -0.807  |
| <A19 = E19>                    | NFPpYQQDFPFG     | 57        | 0.554        | <A17 = E17>                    | DPHpYQDPHSTG     | 25        | -0.816  |
| <A1 = E1>                      | EPOpYEEIPIYG     | 57        | 0.543        | C20                            | DNIpYEWSTIG      | 25        | -0.820  |
| <A20 = E20>                    | NAEpYLRVAPQG     | 57        | 0.539        | F2                             | SADpYMNLFHFKG    | 25        | -0.823  |
| A23                            | FFIpyENNVNPEG    | 56        | 0.512        | H5                             | DGLpYQGLSTAG     | 24        | -0.854  |
| D23                            | EDIpYESRHEIG     | 56        | 0.502        | H25                            | KIRpYESLTDPG     | 24        | -0.876  |
| D18                            | TFGpYQAPEIRG     | 55        | 0.487        | A25                            | NFPpYEPPIRGG     | 22        | -0.933  |
| C13                            | KFHpYDNNTAGIG    | 55        | 0.455        | F25                            | PLVpYVIVGKRG     | 21        | -0.987  |
| D5                             | IESpYQNLTRVG     | 54        | 0.442        | C23                            | AKApYDHLFKLG     | 21        | -1.003  |
| D12                            | KSRpYSDLDFEG     | 53        | 0.400        | F7                             | DQApYANSQPAG     | 20        | -1.020  |
| D21                            | LDGpYDRDDKEG     | 53        | 0.381        | B9                             | DGDpYEFLLKSWG    | 20        | -1.030  |
| B20                            | KRPpYFTVDEAG     | 53        | 0.369        | H9                             | SDPpYAIYVFLG     | 20        | -1.031  |
| B24                            | ESpYQELQGG       | 52        | 0.352        | H23                            | SITpYAAVARHG     | 20        | -1.036  |
| B1                             | EHPpYELLTAG      | 52        | 0.352        | D1                             | NPVpYATLYMGG     | 19        | -1.073  |
| B18                            | ITIpYSTINHSG     | 52        | 0.333        | H12                            | VNNpYSEAIKIG     | 18        | -1.110  |
| F23                            | NFPpYWNHSLPG     | 52        | 0.332        | B10                            | GHEpYTNIKYSG     | 18        | -1.115  |
| C17                            | GLEpYSGIQELG     | 52        | 0.330        | D7                             | DGTpYETQGGKG     | 18        | -1.117  |
| B25                            | EPTpYLVIDPRG     | 51        | 0.321        | G22                            | DGGpYMDMSKDG     | 17        | -1.151  |
| B6                             | SYDpYDLIIIGG     | 51        | 0.313        | F3                             | QNGpYENPTYKYG    | 17        | -1.183  |
| G15                            | EPVpYSMEAADG     | 51        | 0.292        | D6                             | DKEpYYSVHNKG     | 16        | -1.190  |
| D2                             | ISRpYETSSTSG     | 50        | 0.240        | F6                             | DSVpYANWMLSG     | 16        | -1.224  |
| B21                            | RILpYQNLNEPG     | 49        | 0.236        | G20                            | AEApYSEIGMKG     | 15        | -1.242  |
| C12                            | GHEpYIYVDFMG     | 49        | 0.226        | G5                             | ENPpYSEVGKIG     | 13        | -1.332  |
| <D24 = G11>                    | ATLpYAVVENVG     | 49        | 0.201        | H7                             | HRIpYSYVVSRG     | 12        | -1.398  |
| D13                            | MEPpYEAQRIMG     | 48        | 0.180        | H18                            | EELpYSKVTPRG     | 10        | -1.446  |
| <A11 = E11>                    | PQRpYLVIIQGG     | 48        | 0.155        | H8                             | EVEpYSTVASPG     | 10        | -1.460  |
| D3                             | SFGpYDKPHVLG     | 47        | 0.144        | F1                             | AALpYKMLLHSG     | 10        | -1.469  |
| G14                            | YDPpYSEEDPDG     | 47        | 0.140        | H16                            | KLLpYAKDIPTG     | 9         | -1.505  |
| A24                            | GEGpYEEPDSEG     | 47        | 0.120        | G25                            | FREpYDYDLKWG     | 9         | -1.528  |
| D15                            | NVpYSEVRIIG      | 46        | 0.101        | H2                             | PGLpYSKTMTPG     | 7         | -1.577  |
| <D20 = H4>                     | GEApYEDDEHHG     | 45        | 0.038        | G6                             | AELpYEKLPQGG     | 7         | -1.610  |
| D19                            | AGHpYEDTILKG     | 45        | 0.035        | G23                            | DVVpYLVKVAKPG    | 5         | -1.690  |
| G9                             | SVMpYTVVPMQMG    | 45        | 0.025        | H10                            | AKLpYSLVIWGG     | 5         | -1.697  |
| <B22 = F5>                     | SQLpYTNPDSRG     | 45        | 0.022        | H13                            | EEVpYVKHMNG      | 5         | -1.702  |
| B23                            | APSpYLEISSMG     | 44        | 0.018        | H19                            | GEVpYEGVWKKG     | 5         | -1.702  |
| B19                            | EDDpYESPNDG      | 44        | -0.011       | H24                            | SKYpYTPVLAAG     | 2         | -1.810  |



**Supplementary table 7. Crystallographic data collection and refinement statistics.**

| Crystal                                               | apo LeSH                                              | LeSH-phosphotyrosine complex                          | LeSH-IL2R $\beta$ pTyr387 peptide complex             | LeSH-DnaJA1 pTyr381 peptide complex                   | apo RavO SH2 domain    | RavO SH2-Shc1 pTyr317 peptide complex |
|-------------------------------------------------------|-------------------------------------------------------|-------------------------------------------------------|-------------------------------------------------------|-------------------------------------------------------|------------------------|---------------------------------------|
| PDB code                                              | 6E8H                                                  | 6E8I                                                  | 6E8K                                                  | 6E8M                                                  | 6DM3                   | 6DM4                                  |
| <b>Data collection</b>                                |                                                       |                                                       |                                                       |                                                       |                        |                                       |
| Space group                                           | <i>P</i> 2 <sub>1</sub> 2 <sub>1</sub> 2 <sub>1</sub> | <i>P</i> 2 <sub>1</sub> 2 <sub>1</sub> 2 <sub>1</sub> | <i>P</i> 2 <sub>1</sub> 2 <sub>1</sub> 2 <sub>1</sub> | <i>P</i> 2 <sub>1</sub> 2 <sub>1</sub> 2 <sub>1</sub> | <i>C</i> 2             | <i>P</i> 1                            |
| Cell dimensions<br><i>a</i> , <i>b</i> , <i>c</i> (Å) | 42.3, 66.5, 68.2                                      | 40.8, 64.1, 67.9                                      | 40.5, 64.2, 67.5                                      | 40.9, 64.7, 67.9                                      | 50.0, 73.0, 72.0       | 44.45, 45.04, 74.75                   |
| $\alpha$ , $\beta$ , $\gamma$ (°)                     | 90, 90, 90                                            | 90, 90, 90                                            | 90, 90, 90                                            | 90, 90, 90                                            | 90, 109.9, 90          | 72.60, 90.14, 77.55                   |
| Resolution (Å)                                        | 19.6-1.66 (1.76-1.66)*                                | 1.67-34.97 (1.76-1.67)                                | 34.7-1.70 (1.79-1.70)                                 | 33.9-1.60 (1.69-1.60)                                 | 25.00-1.95 (1.98-1.95) | 15.00 – 1.90 (1.93-1.90)              |
| <i>R</i> <sub>merge</sub>                             | 0.052 (0.284)                                         | 0.058 (0.166)                                         | 0.052 (0.491)                                         | 0.052 (0.503)                                         | 0.058 (0.414)          | 0.050 (0.572)                         |
| Mean( <i>I</i> / $\sigma$ <i>I</i> )                  | 68.2 (16.9)                                           | 8.5 (4.0)                                             | 12.6 (2.4)                                            | 24.9 (4.1)                                            | 28.6 (2.9)             | 33.19 (3.2)                           |
| Anomalous completeness (%)                            | 97.5 (84.0)                                           | 85.4 (77.2)                                           | 91.3 (77.8)                                           | 90.3 (90.2)                                           | N/A                    | N/A                                   |
| Anomalous redundancy                                  | 29.4 (26.2)                                           | 1.7 (1.7)                                             | 2.8 (2.7)                                             | 5.8 (5.3)                                             | N/A                    | N/A                                   |
| <b>Refinement</b>                                     |                                                       |                                                       |                                                       |                                                       |                        |                                       |
| Resolution (Å)                                        | 19.6-1.68                                             | 30.7-1.68                                             | 25.9-1.71                                             | 24.2-1.61                                             | 24.8-1.95              | 14.8-1.90                             |
| No. of reflections                                    | 42244                                                 | 34765                                                 | 34992                                                 | 41196                                                 | 16361                  | 41046                                 |
| <i>R</i> <sub>work</sub> / <i>R</i> <sub>free</sub>   | 0.212 / 0.248                                         | 0.217 / 0.250                                         | 0.188 / 0.211                                         | 0.199 / 0.212                                         | 0.261 / 0.318          | 0.183 / 0.230                         |
| Number of atoms                                       |                                                       |                                                       |                                                       |                                                       |                        |                                       |
| SH2                                                   | 1310                                                  | 1302                                                  | 1302                                                  | 1302                                                  | 1755                   | 3883                                  |
| Peptide ion                                           | 0                                                     | 17 (pTyr)                                             | 29                                                    | 21                                                    | 0                      | 171                                   |
| Water                                                 | 1 (chloride ion)                                      | 0                                                     | 0                                                     | 0                                                     | 0                      | 30 (sulfate ions)                     |
|                                                       | 243                                                   | 233                                                   | 148                                                   | 146                                                   | 66                     | 448                                   |
| <i>B</i> -factors                                     |                                                       |                                                       |                                                       |                                                       |                        |                                       |
| SH2                                                   | 28.6                                                  | 20.9                                                  | 34.7                                                  | 32.3                                                  | 57.6                   | 49.9                                  |
| Peptide ion                                           | n/a                                                   | 16.3 (pTyr)                                           | 41.3                                                  | 27.9                                                  | n/a                    | 81.9                                  |
| Water                                                 | 36.8                                                  | n/a                                                   | n/a                                                   | n/a                                                   | n/a                    | 75.6                                  |
|                                                       | 36.2                                                  | 29.0                                                  | 40.6                                                  | 39.9                                                  | 51.0                   | 52.9                                  |
| R.m.s. deviations                                     |                                                       |                                                       |                                                       |                                                       |                        |                                       |
| Bond lengths (Å)                                      | 0.006                                                 | 0.006                                                 | 0.006                                                 | 0.006                                                 | 0.007                  | 0.004                                 |
| Bond angles (°)                                       | 0.801                                                 | 0.776                                                 | 0.812                                                 | 0.842                                                 | 1.224                  | 0.616                                 |

\*Values in parentheses are for the highest-resolution shell.

**Supplementary Table 8. Primers used for molecular cloning and site-directed mutagenesis**

*Primers used for cloning the genes into the pCya vector*

|             |                 |                                       |
|-------------|-----------------|---------------------------------------|
| Ldum_LeSH1a | Forward (BamHI) | GAAGAAGGATCCGGATCAAAAGCAGAGTCTAAGGTT  |
|             | Reverse (PstI)  | GGTGGTCTGCAGCTAGAGATTATTCACACTGCTTAG  |
| Lani_LeSH1b | Forward (BamHI) | GAAGAAGGATCCGACCCTAAGCAGAACAACGAGCCA  |
|             | Reverse (Sall)  | GGTGGTGTCTGACTCACCGGGCTTTGTGAGTATTCAC |
| Ldum_LeSH2  | Forward (BamHI) | GAAGAAGGATCCGAAGAGCGTTTAGAAAGATC      |
|             | Reverse (PstI)  | GGTGGTCTGCAGTTATAACTCACTATTGTAGC      |
| Lp_LeSH2    | Forward (BamHI) | GAAGAAGGATCCGAGTCAAAATCAGAAGTACA      |
|             | Reverse (PstI)  | GGTGGTCTGCAGTTAAAAATTAGTATATCTGTTC    |
| Lani_LeSH2a | Forward (BamHI) | GAAGAAGGATCCCAATCCAAGAACGAGTCCTCCTCC  |
|             | Reverse (PstI)  | GGTGGTCTGCAGTCAAGTTTGTGTAGCGGTTGTT    |
| Lani_LeSH2b | Forward (BamHI) | GAAGAAGGATCCGAGTCCAAGAAGGAGAACTC      |
|             | Reverse (PstI)  | GGTGGTCTGCAGTCAAAAGCTTGTGTAGCGGTTCTT  |
| Ldum_LUSH   | Forward (BamHI) | GAAGAAGGATCCCGATTAAAGATAGAAGAAAC      |
|             | Reverse (PstI)  | GGTGGTCTGCAGTTACATTAGGGGTGTTTTTGAAGA  |
| Lp_DoSH     | Forward (BamHI) | GAAGAAGGATCCACGATAGAATGTTATTCTATTG    |
|             | Reverse (PstI)  | GGTGGTCTGCAGTTAAATATTTTTGCAAAGAGTCGGT |
| Lp_RavO     | Forward (BamHI) | GTTGTTGGATCCCCTACTGGAATCGTATTAAG      |
|             | Reverse (SphI)  | GGTGGTGCATGCTTAGCCTCCTTTGGTTGGATTTCG  |
| Llo_LeSH    | Forward (BamHI) | GTTGTTGGATCCGAAGCCATGCAGAAGAACGAGCTG  |
|             | Reverse (XbaI)  | GGTGGTTCTAGATTAACGTAATCTGTAAAGTGTT    |
| Llo_LUSH    | Forward (BamHI) | GTTGTTGGATCCCAGAGCAAGCTGGAGGAAGCCGACA |
|             | Reverse (SphI)  | GGTGGTGCATGCTTAAAAGTTTTTGCAACTCTGCTGG |

*Primers used for cloning the genes into the pETM11/pETM30 vector*

|               |                 |                                            |
|---------------|-----------------|--------------------------------------------|
| Ldum_LUSH     | Forward (NcoI)  | GGTGGTCCATGGGATTTAAGATAGAAGAAACCCGC        |
|               | Reverse (BamHI) | GTTGTTGGATCCTTACATTAGGGGTGTTTTTGAAGAAGAATT |
| Lp_DoSH C-SH2 | Forward (NcoI)  | GGTGGTCCATGGAGAAGGAAGCCGAAACCAAC           |
|               | Reverse (BamHI) | GTTGTTGGATCCTCAGATGTTTTTACACAATGT          |

*Site-directed mutagenesis primers*

|                 |         |                                           |
|-----------------|---------|-------------------------------------------|
| Llo_LeSH R46K   | Forward | CAAGGCAGTGTTCTCATCAAAGATAGCTCTACATATCCAG  |
|                 | Reverse | CTGGATATGTAGAGCTATCTTTGATGAGGAACACTGCCTTG |
| Llo_LeSH R71L   | Forward | GATATAGTCAAGCACATACTGTTTGGCTTGACCGACAAAG  |
|                 | Reverse | CTTTGTCTGGTCAAGCCAAACAGTATGTGCTTGACTATATC |
| Llo_LeSH P85A   | Forward | GAAAACGGCACCCAAAGCCCTCATGAGCCATTG         |
|                 | Reverse | CAATGGCTCATGAGGGGCTTTGGGTGCCGTTTTTC       |
| Ldum_LeSH1 D44S | Forward | GTTTCTGATTTCGCGAAAGCGAGAAGTTGCAGGG        |
|                 | Reverse | CCCTGCAACTTCTCGCTTTCGCGAATCAGAAAC         |
| Lp_RavO R266K   | Forward | CAAAGCCGAGTTTATCCTCAAATGGTCTCAGCCAACGAG   |
|                 | Reverse | CTCGTTGGCTGAGGACCATTTGAGGATAAACTCGGCTTGG  |
| Lp_RavO T310A   | Forward | GAACTGTTTAGCATCAACGCCGCTTCTAACAAGGTGAC    |
|                 | Reverse | GTCACCTTGTTAGAAGCGGCGTTGATGCTAAACAGTTC    |
